# Supplementary material for: Phylogenomic Evidence for a Myxococcal Contribution to the Mitochondrial Fatty Acid Beta-Oxidation
Source: PubMed Central journal article supplement (PMC3131387; doi:10.1371/journal.pone.0021989), 2011-07-07

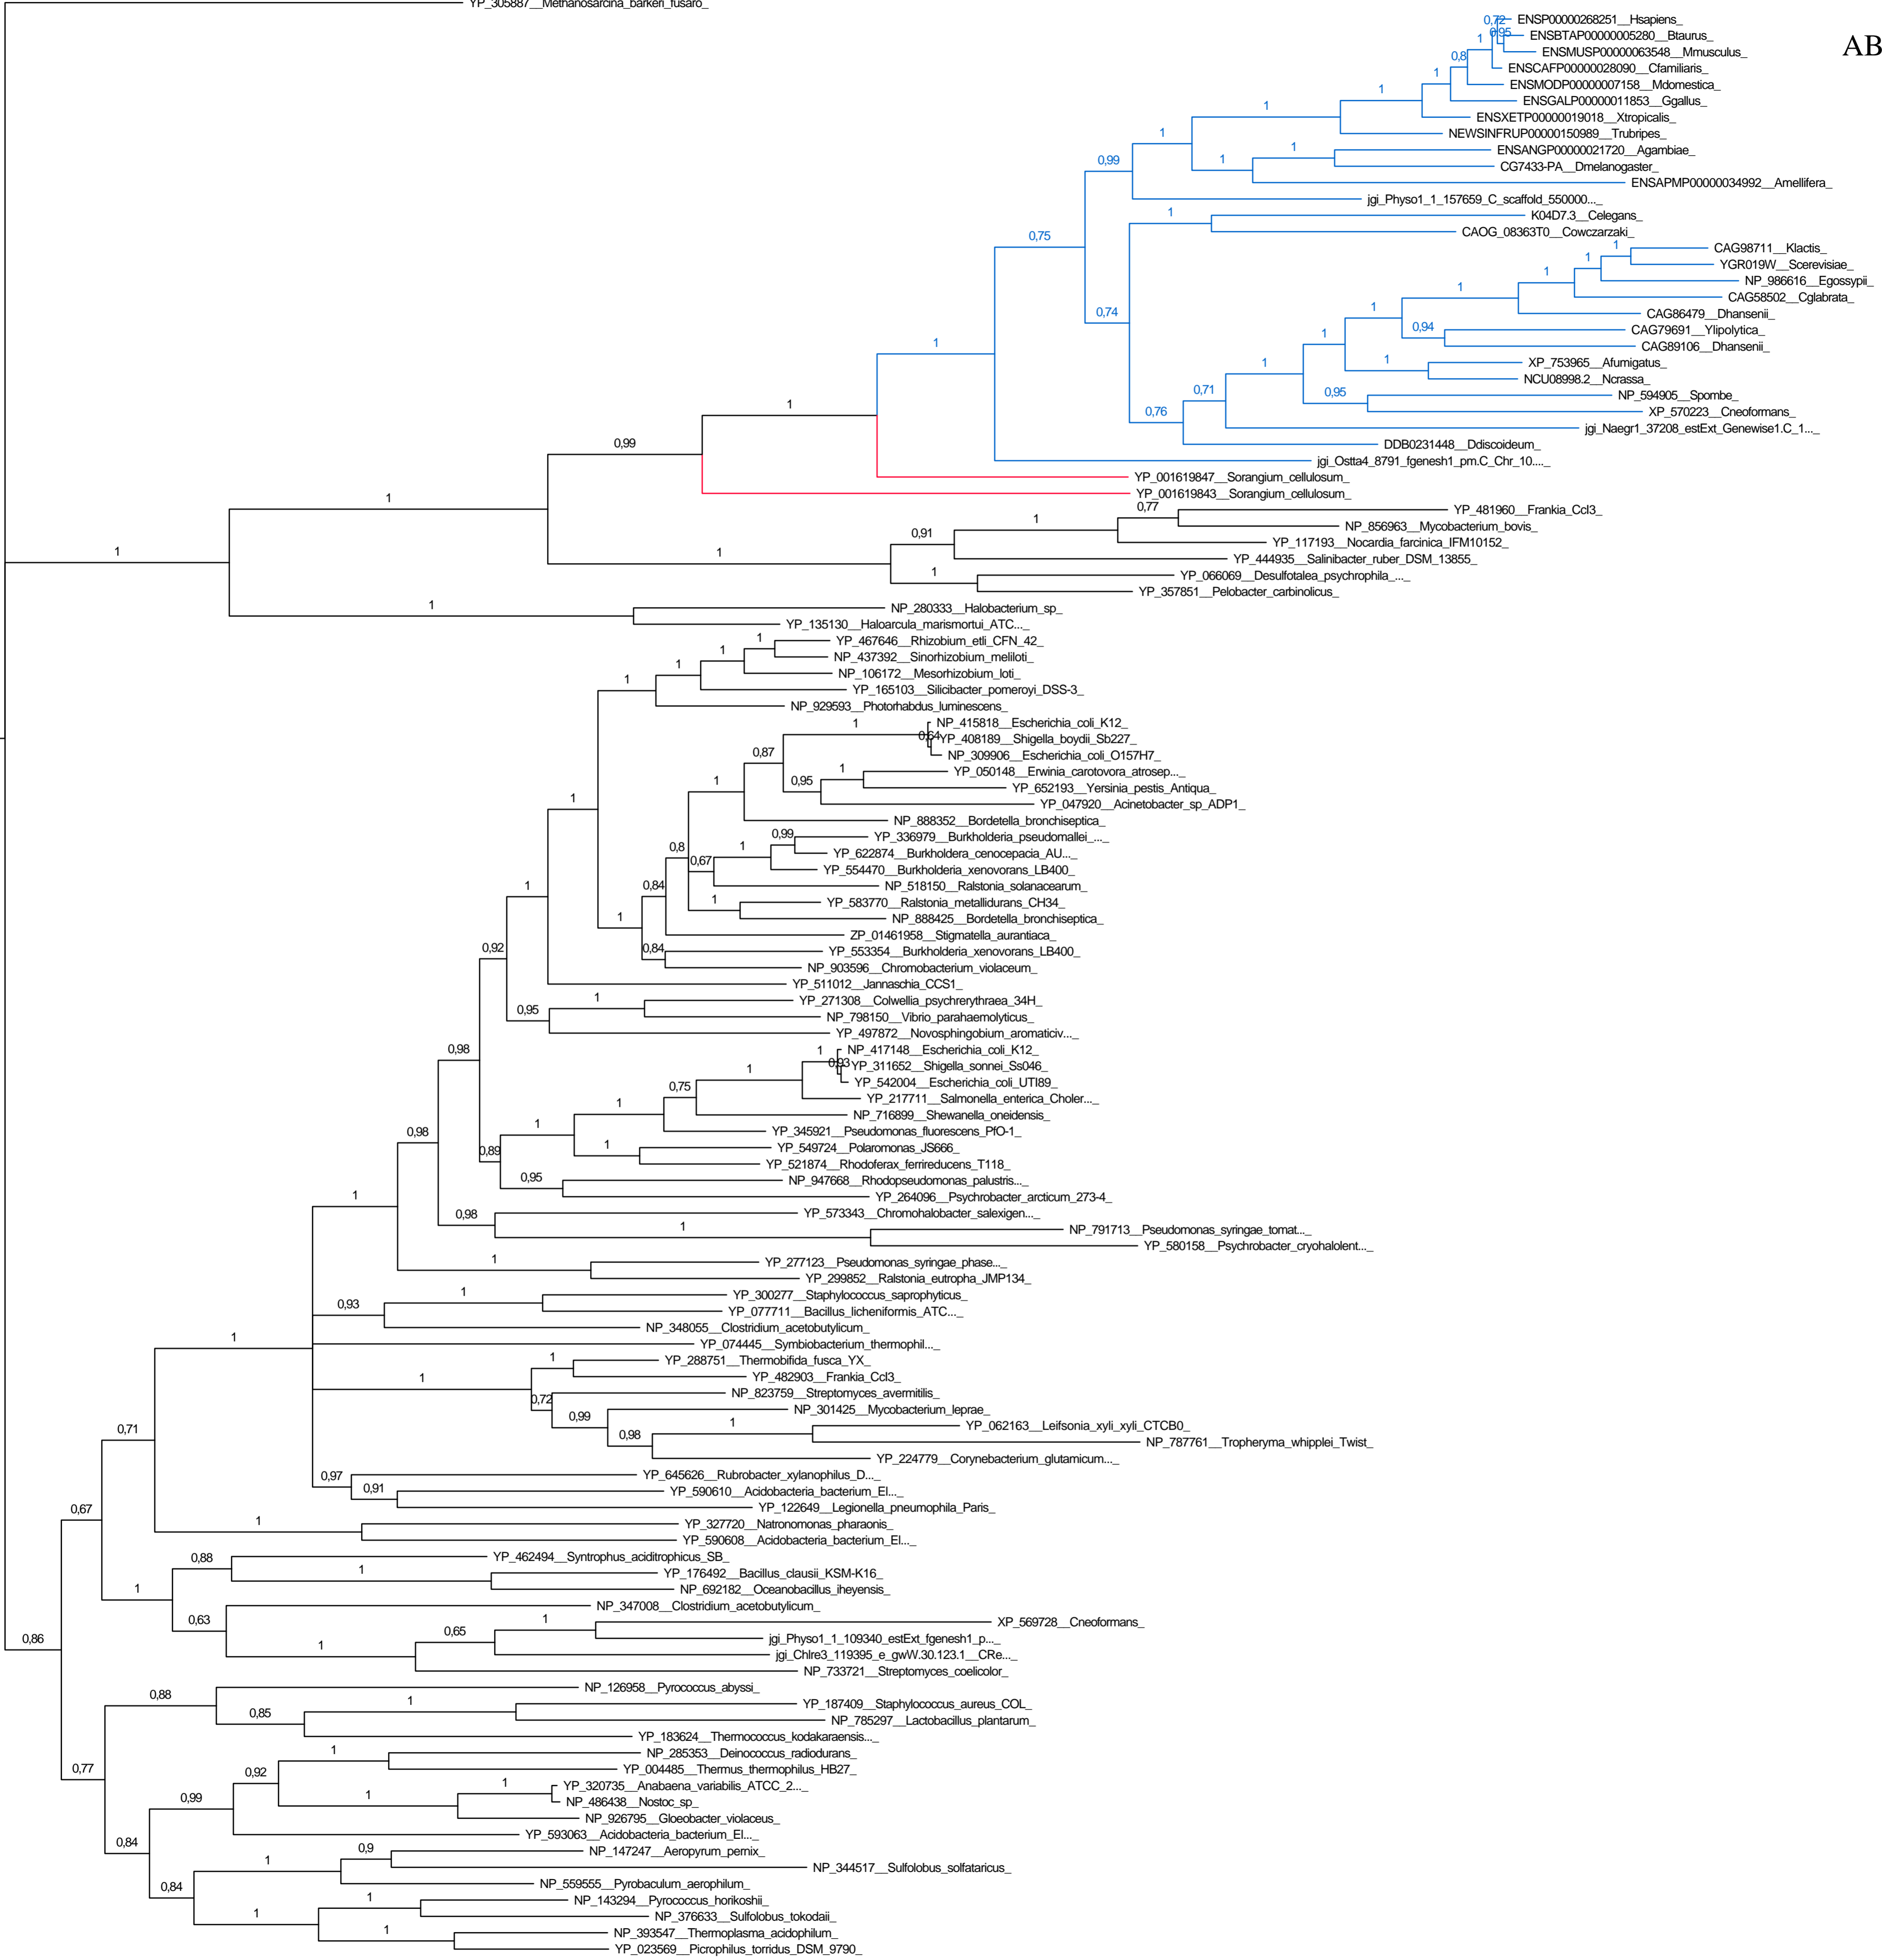



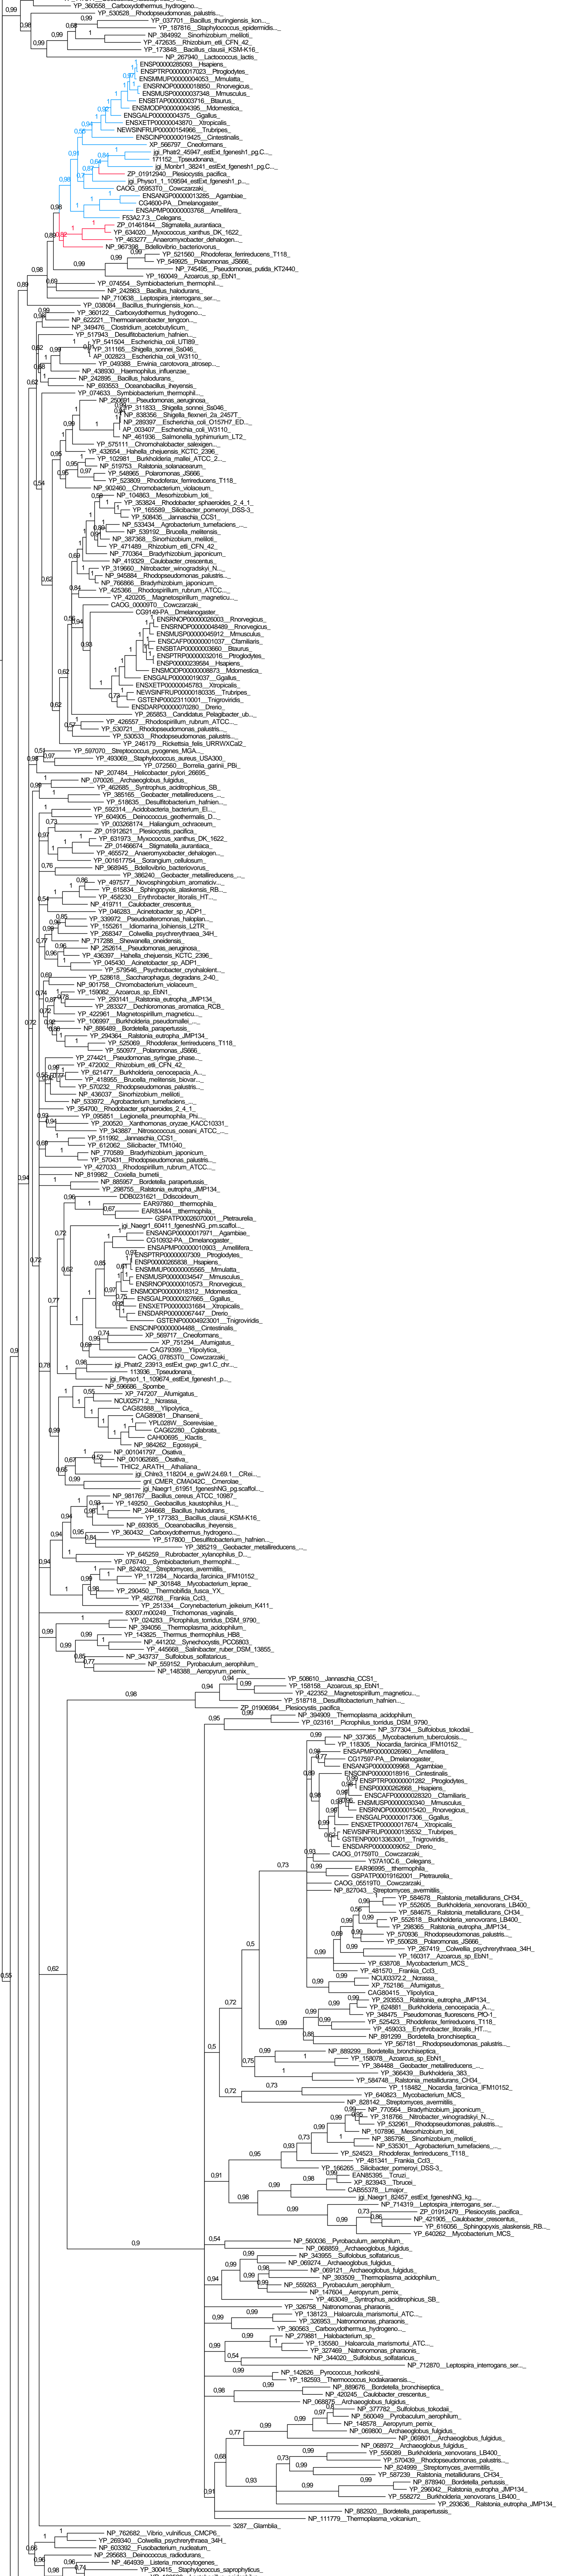



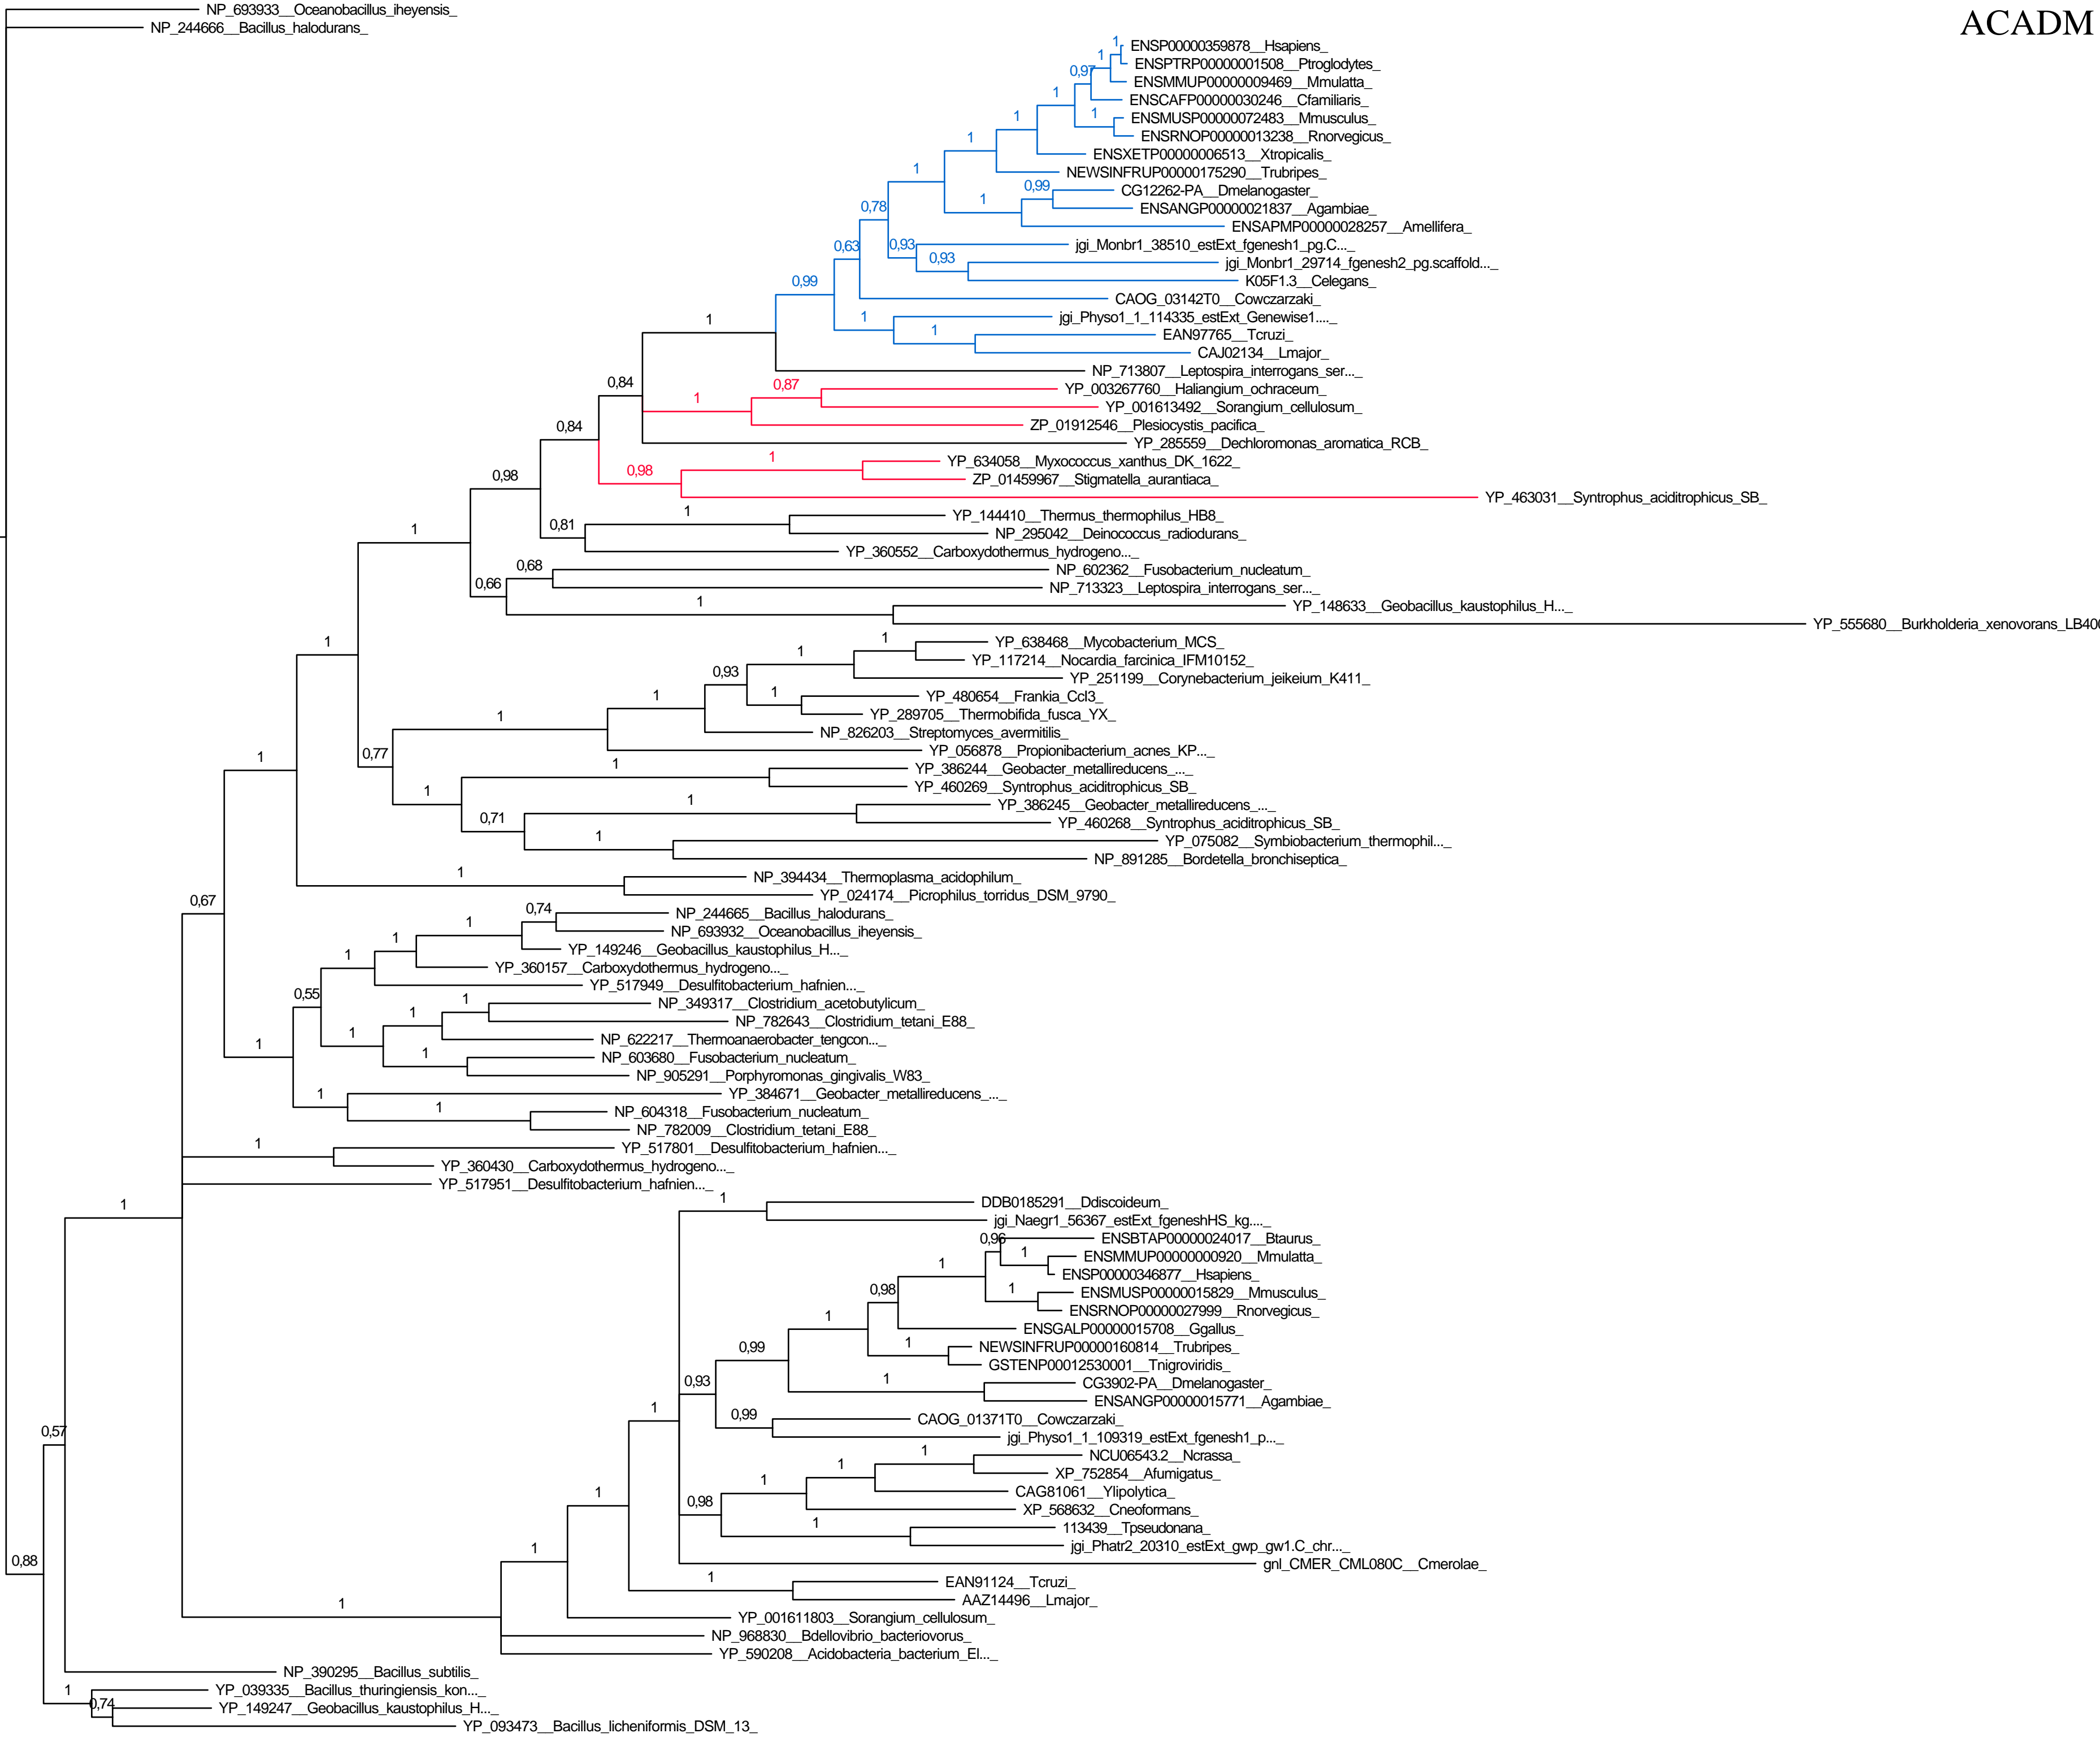

# ACADS

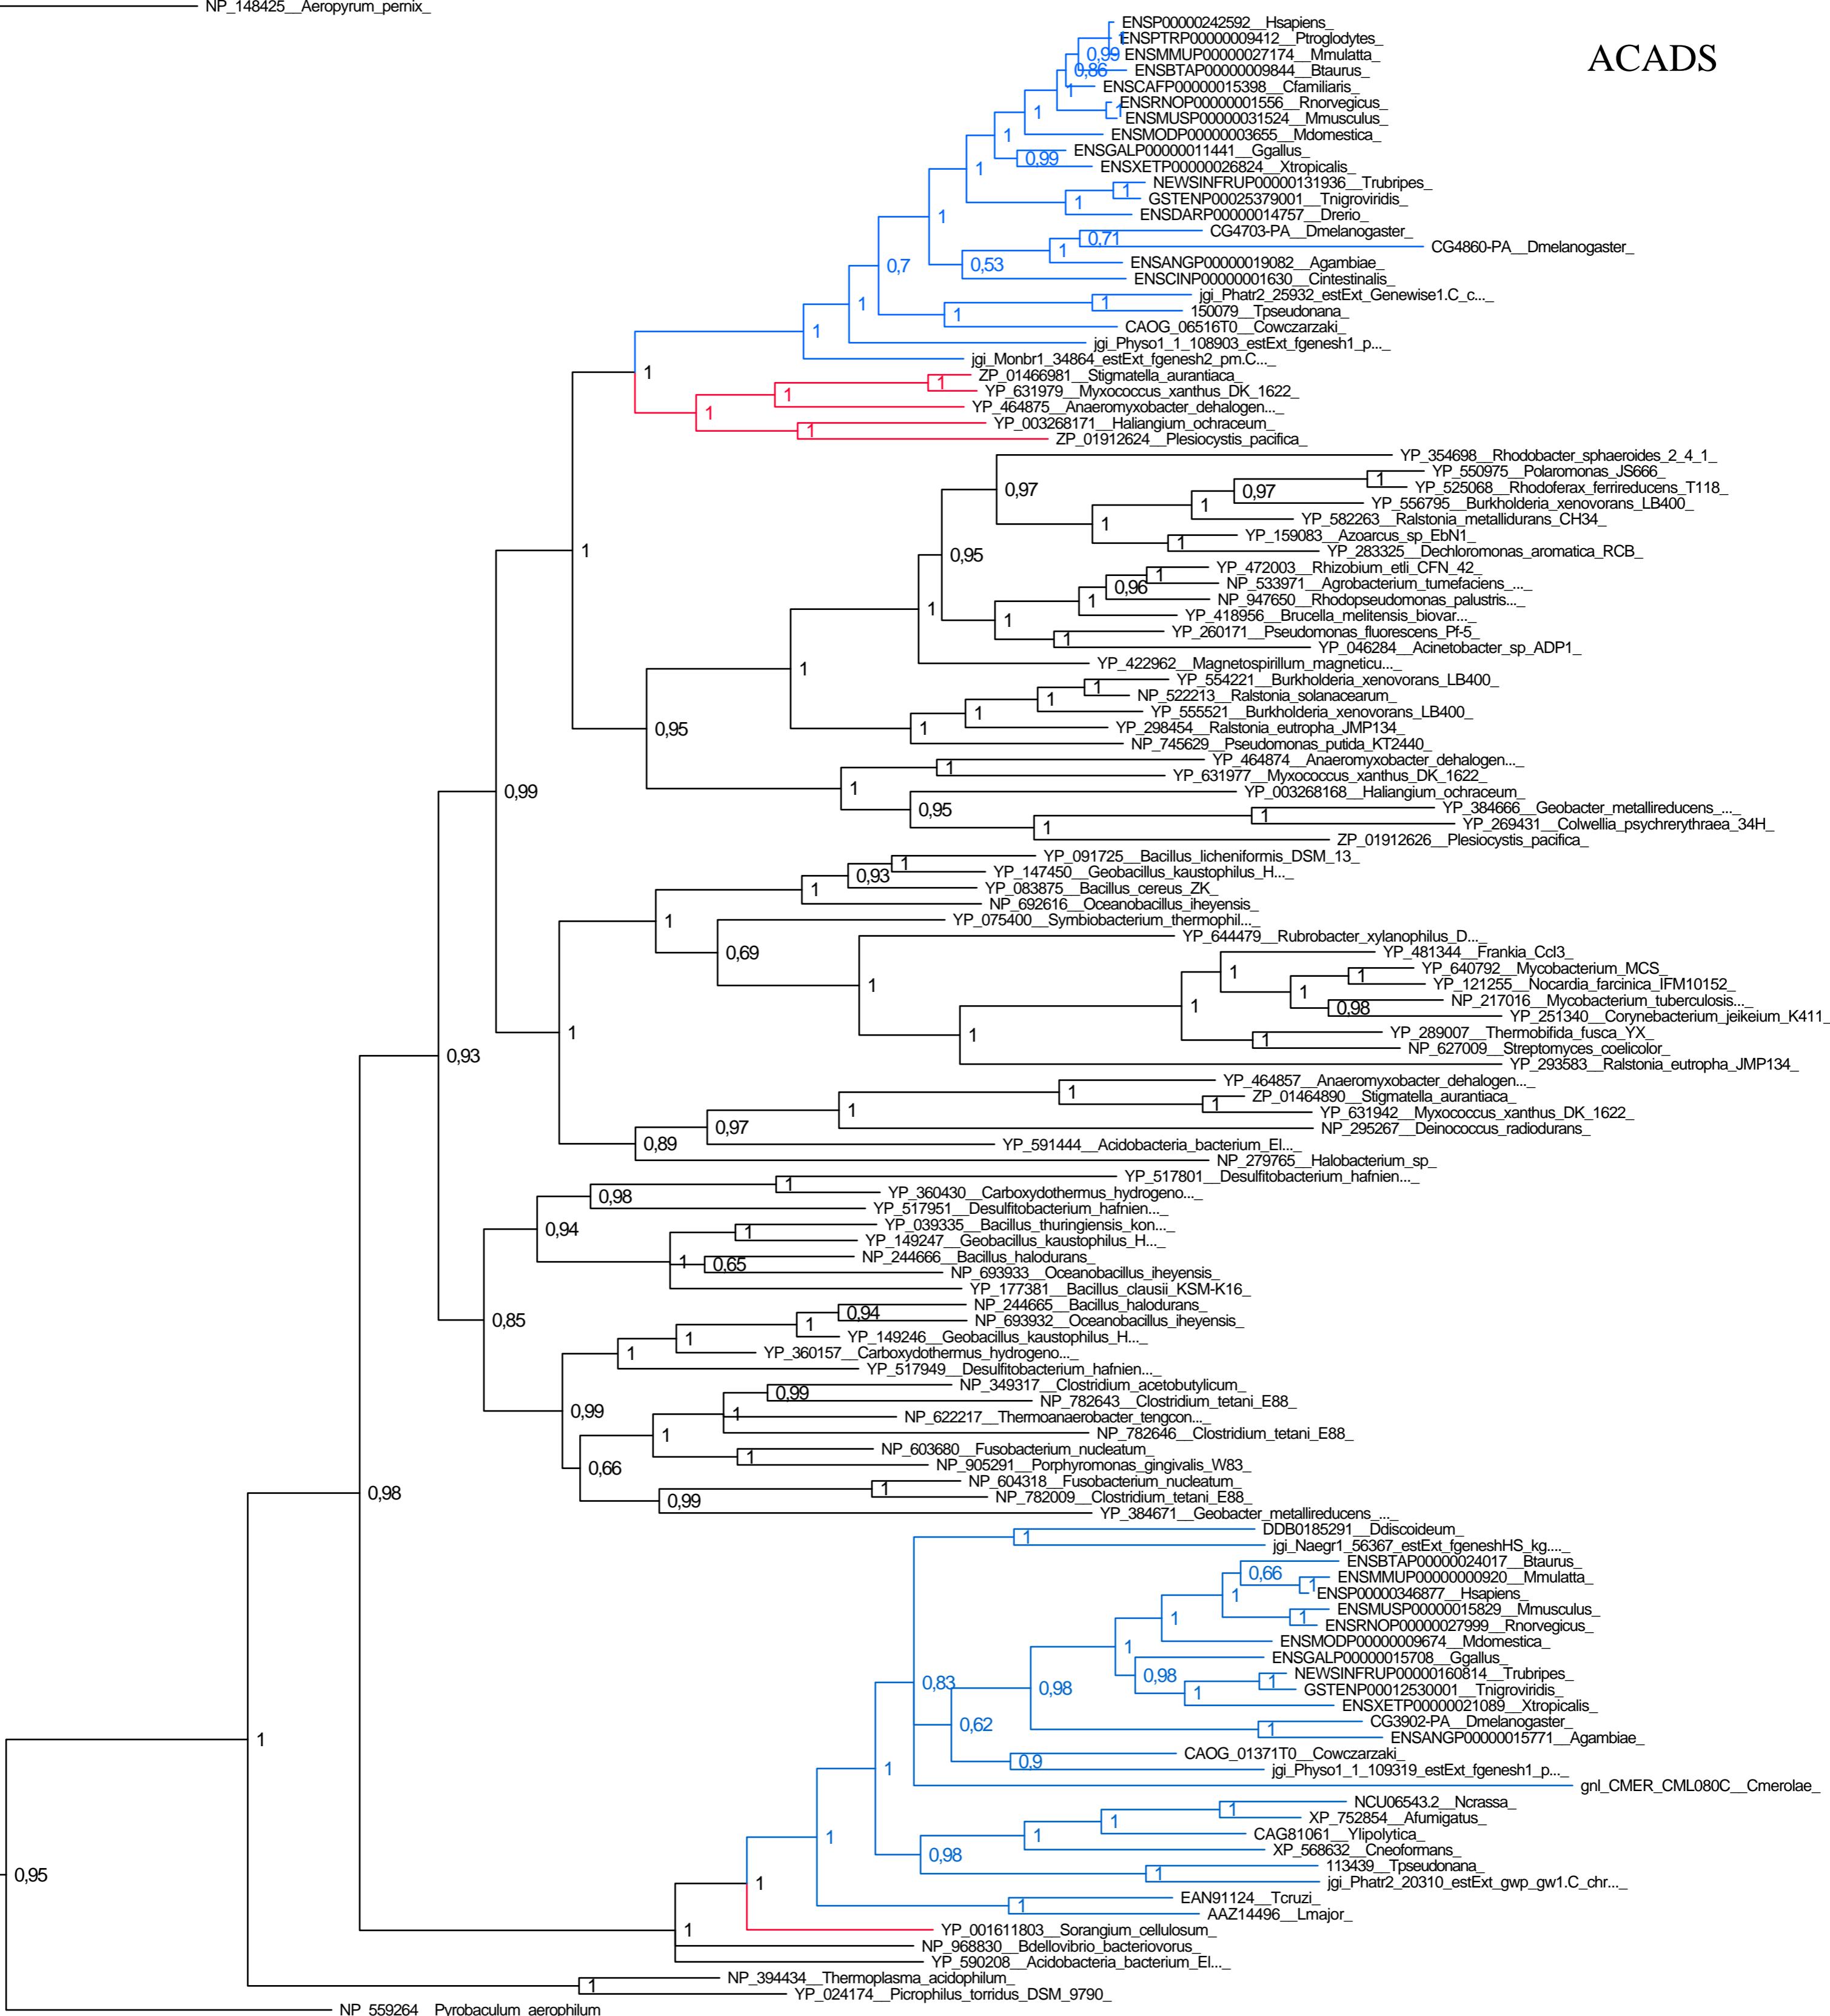

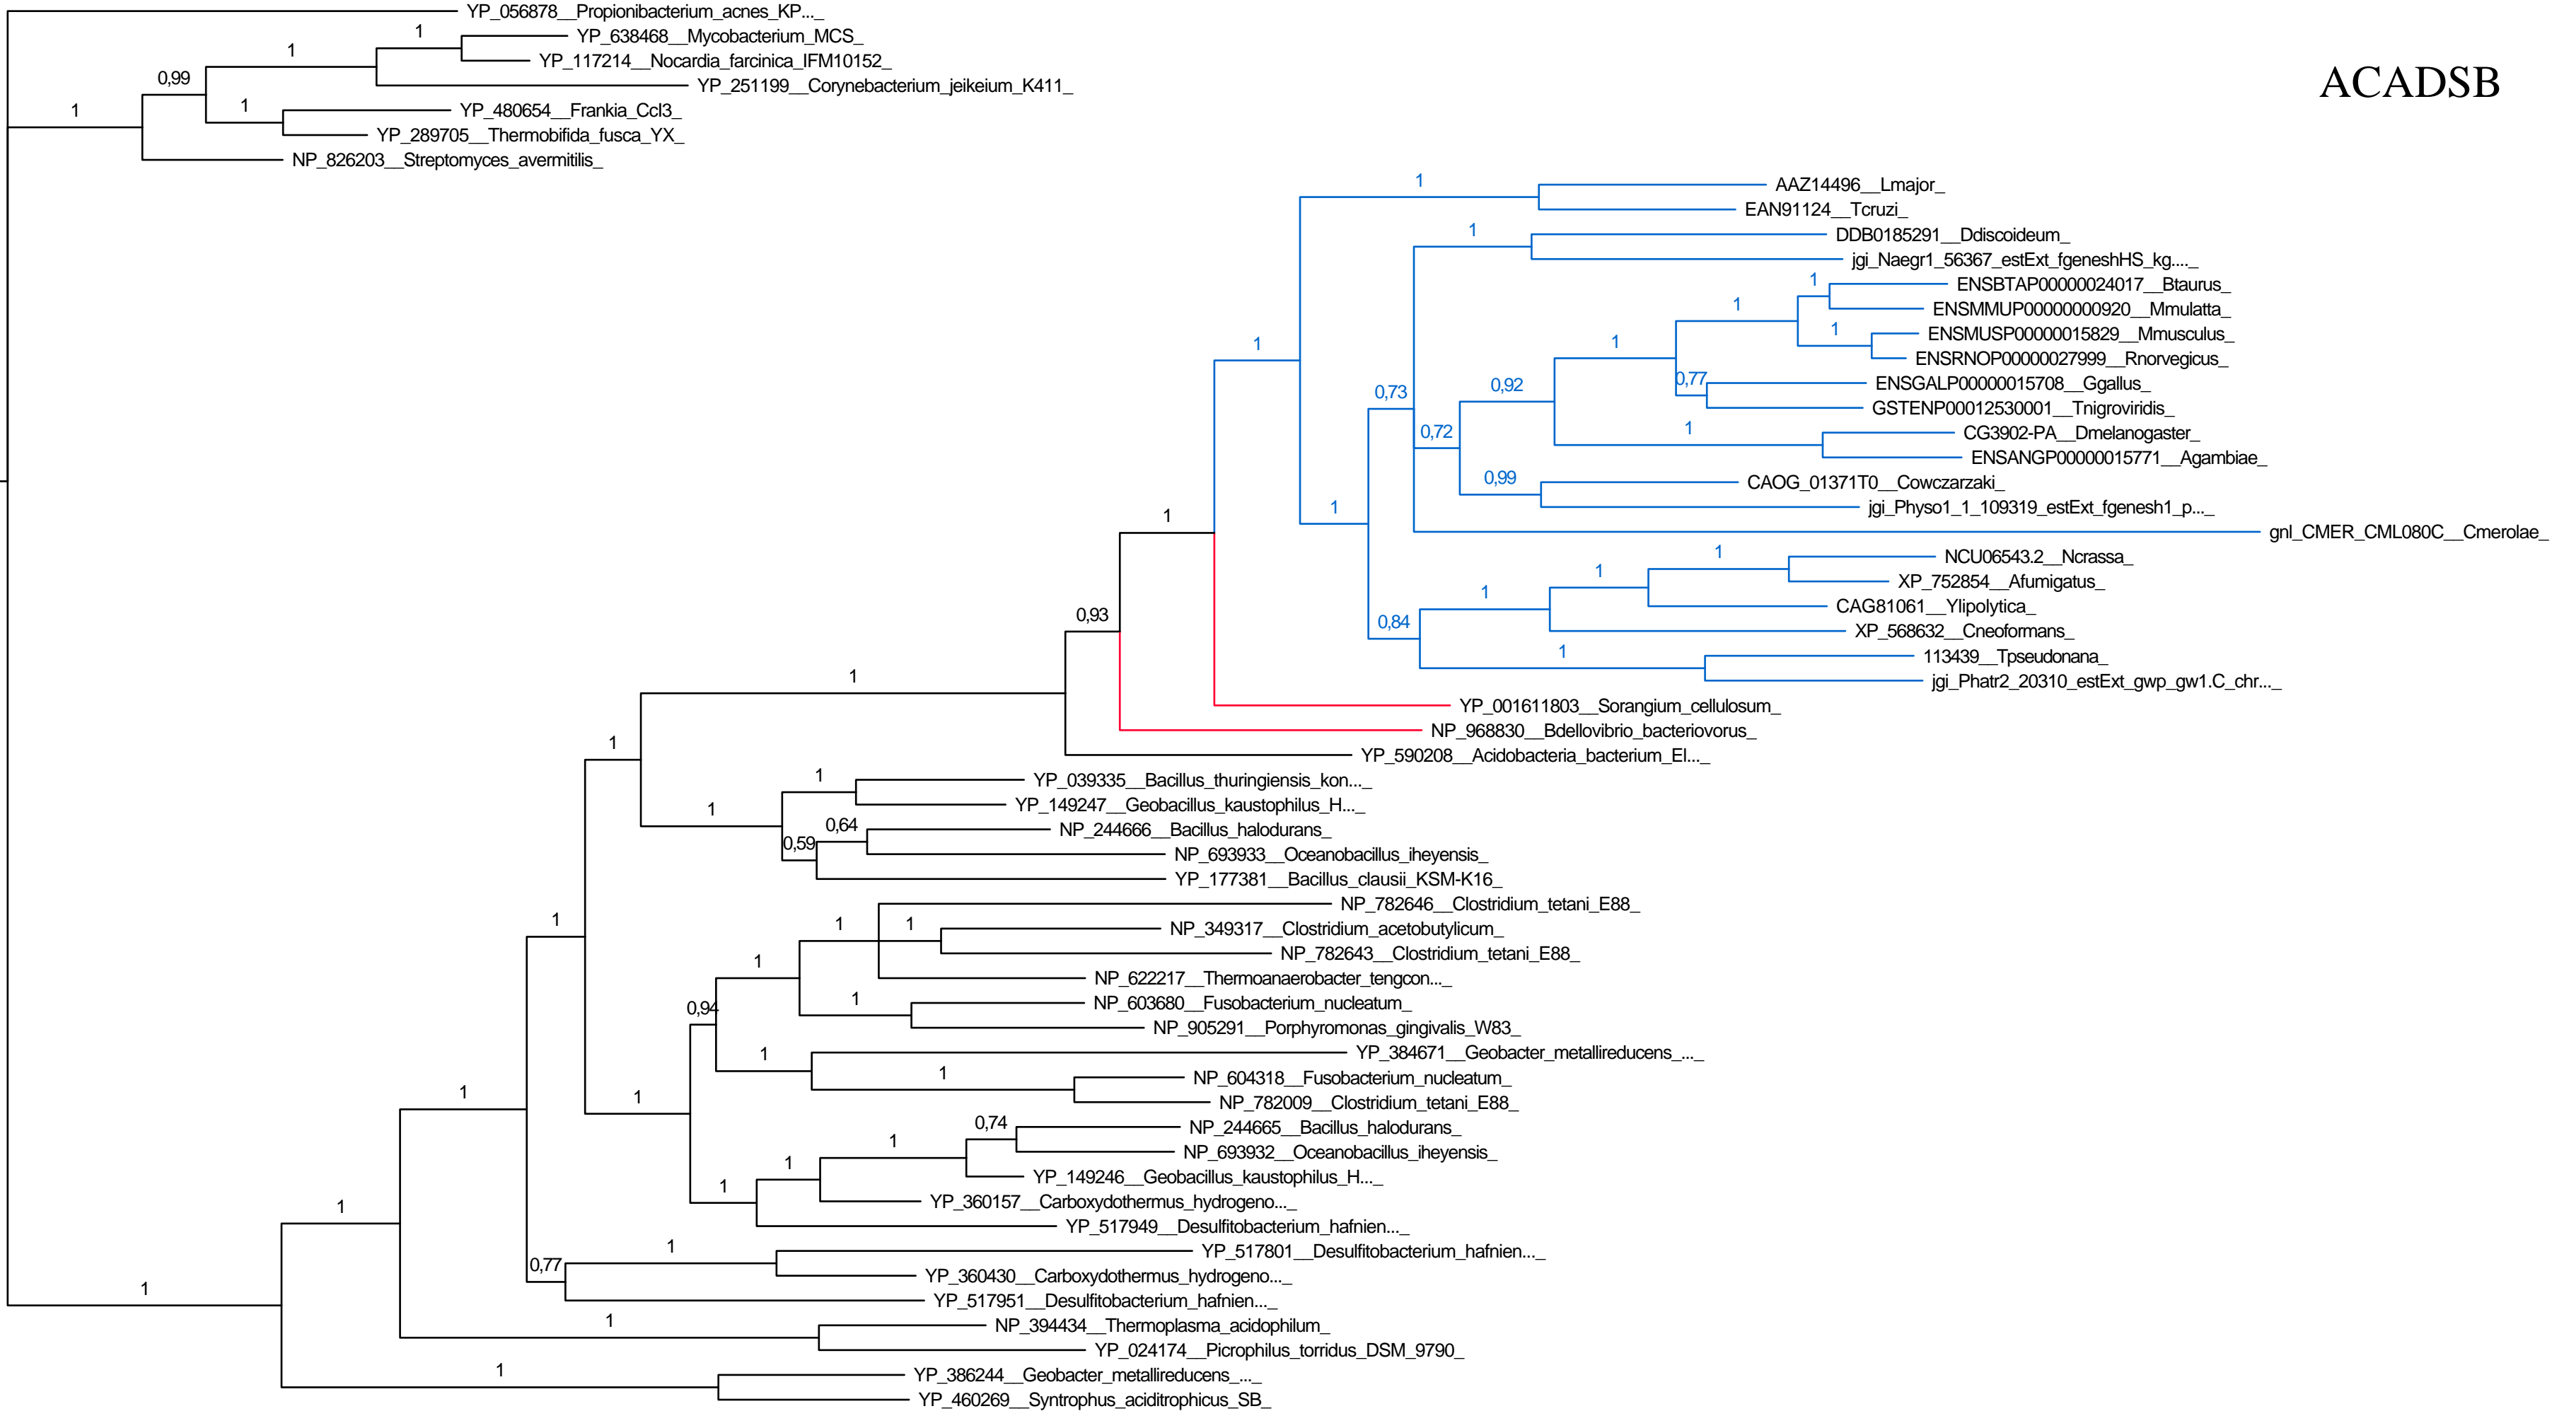

# ACADVL-ACAD9

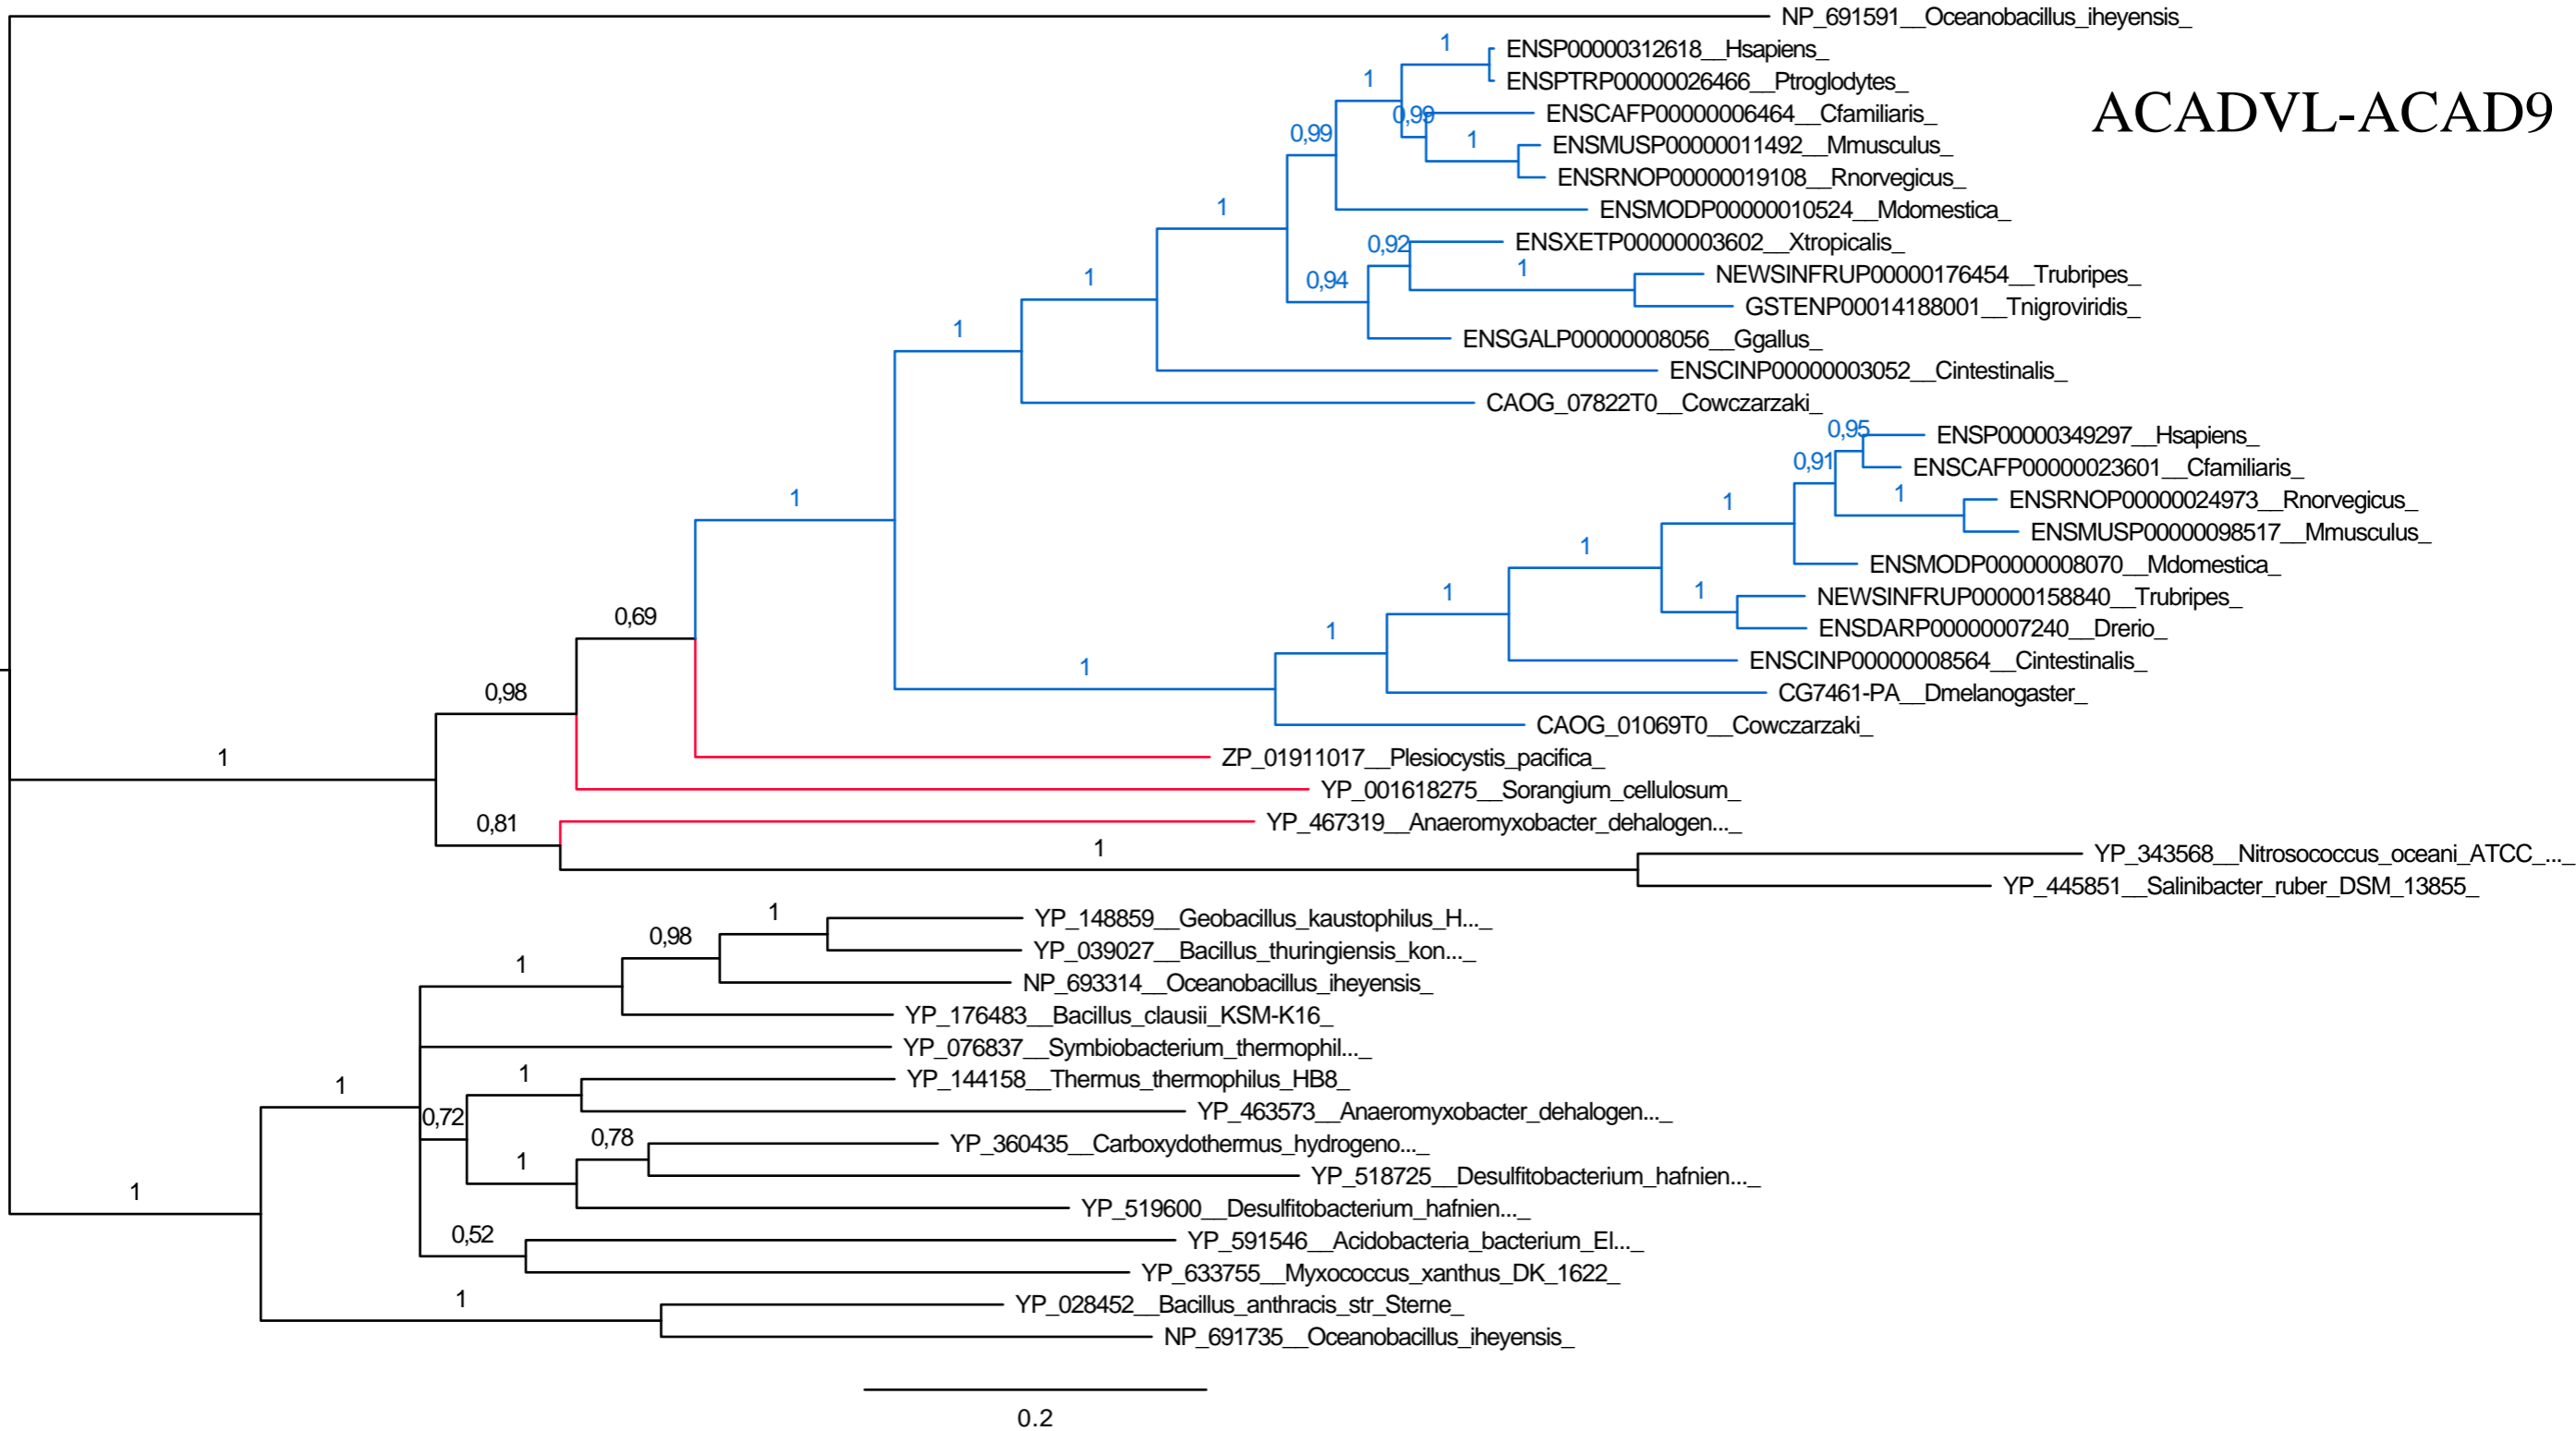



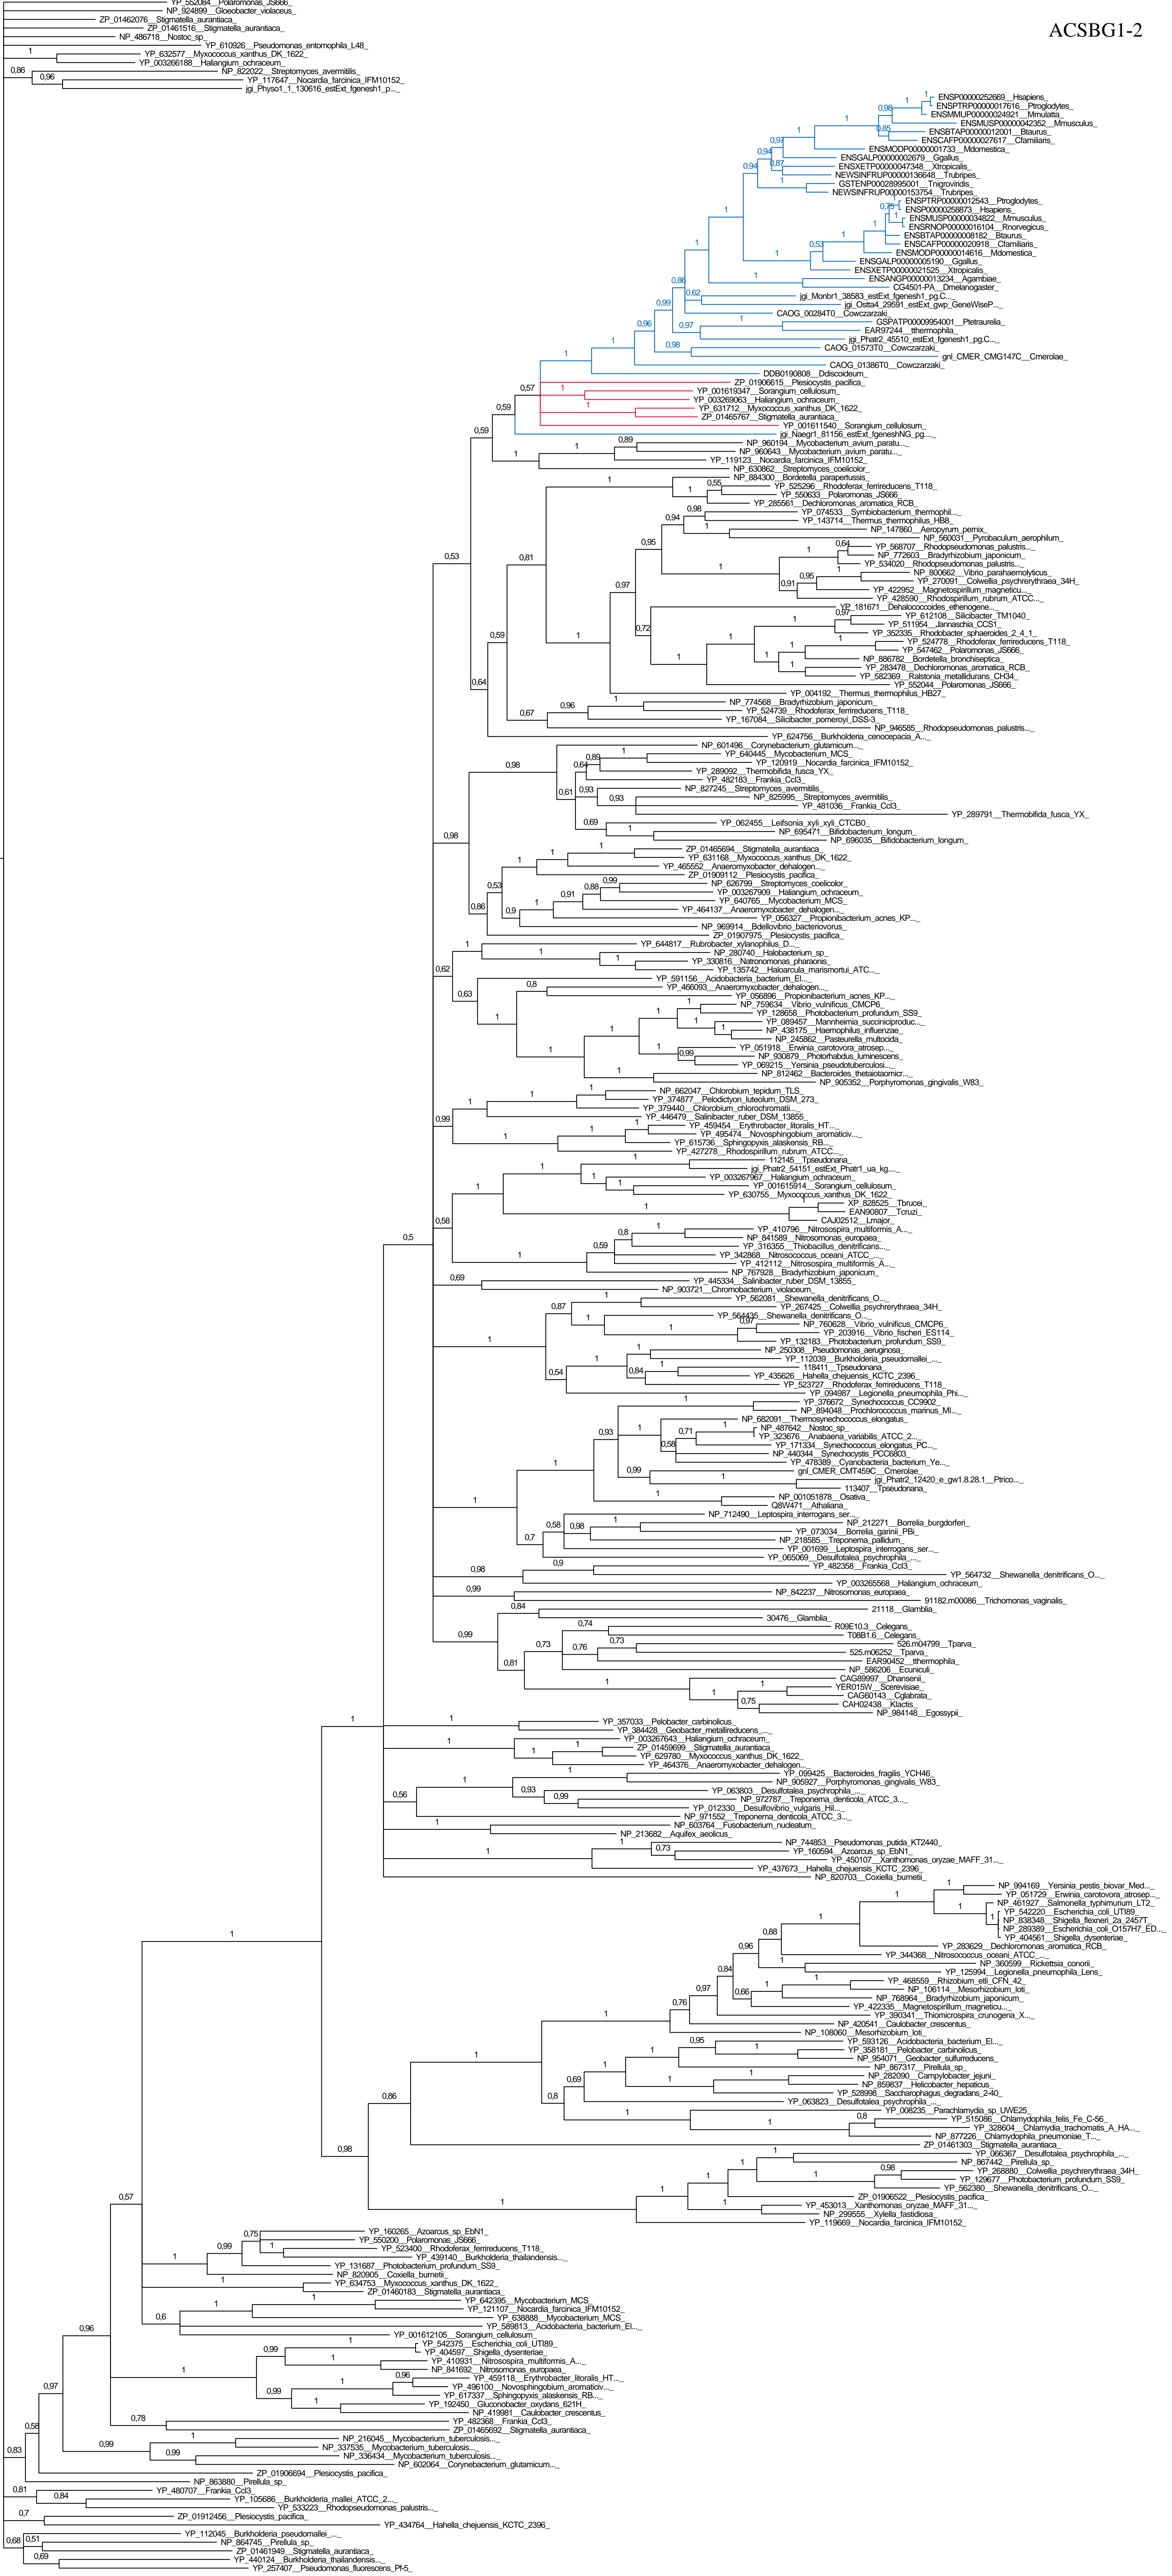



# ACSF3

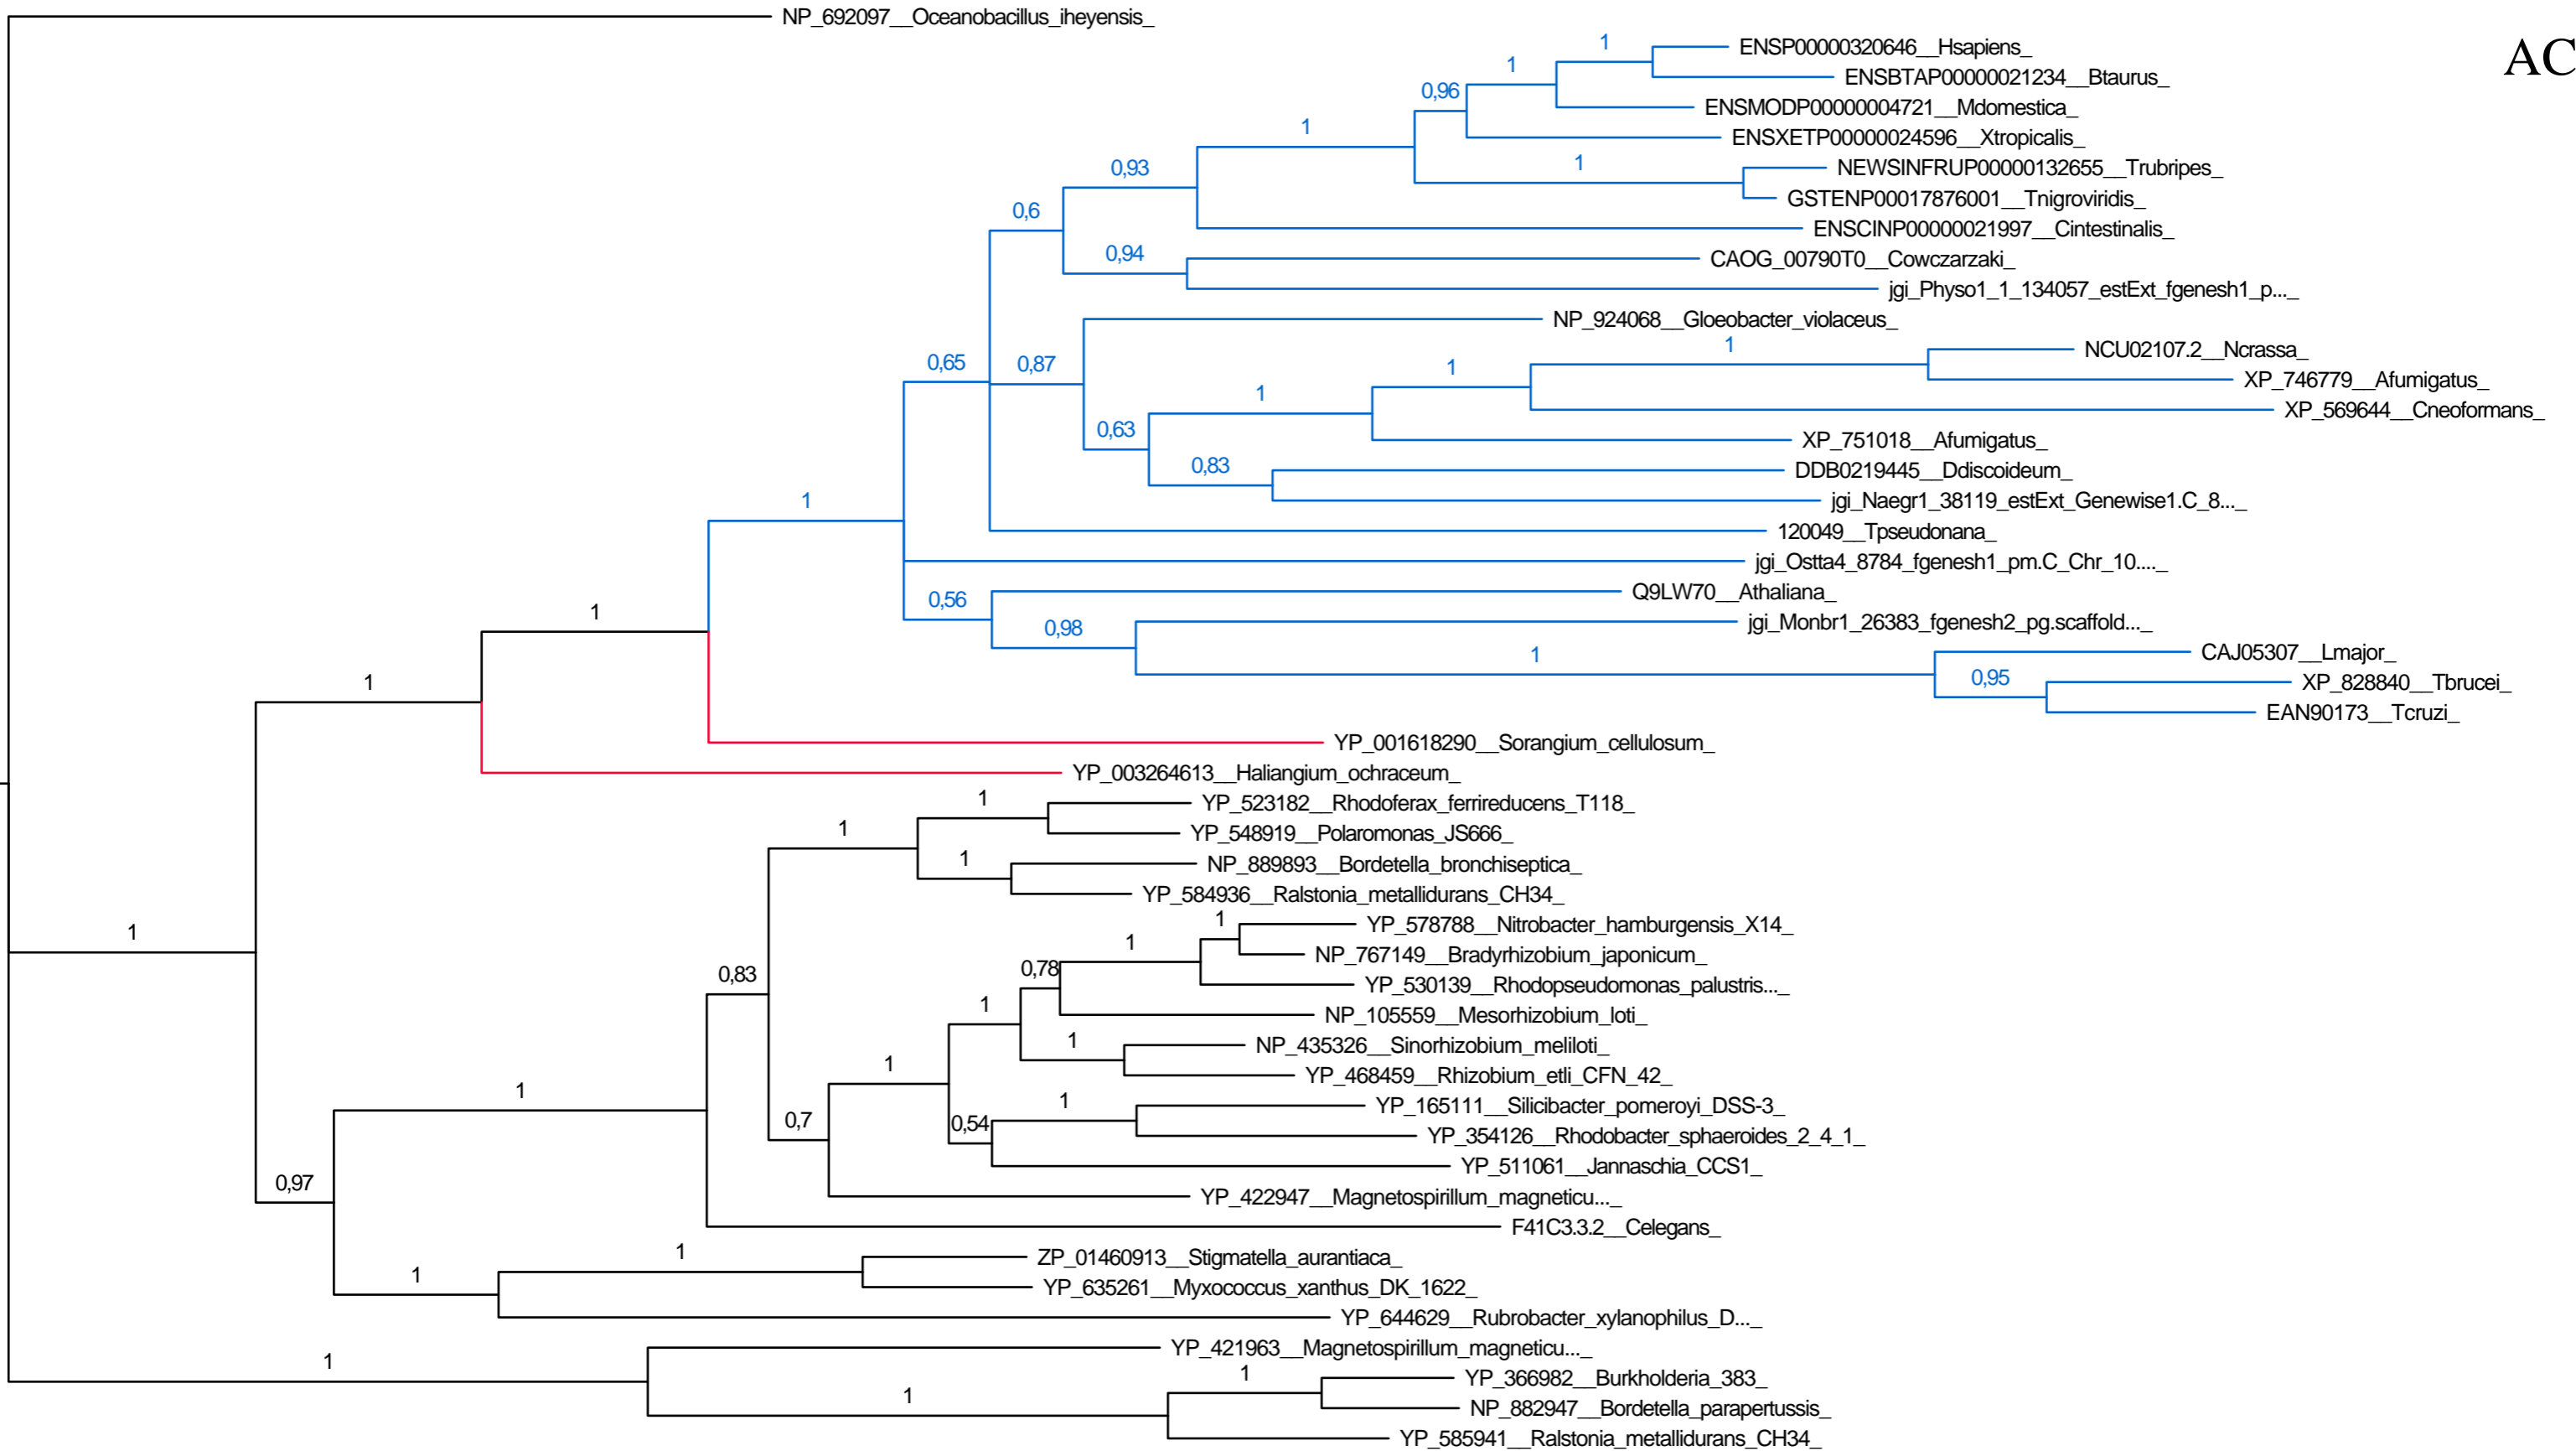

0.2



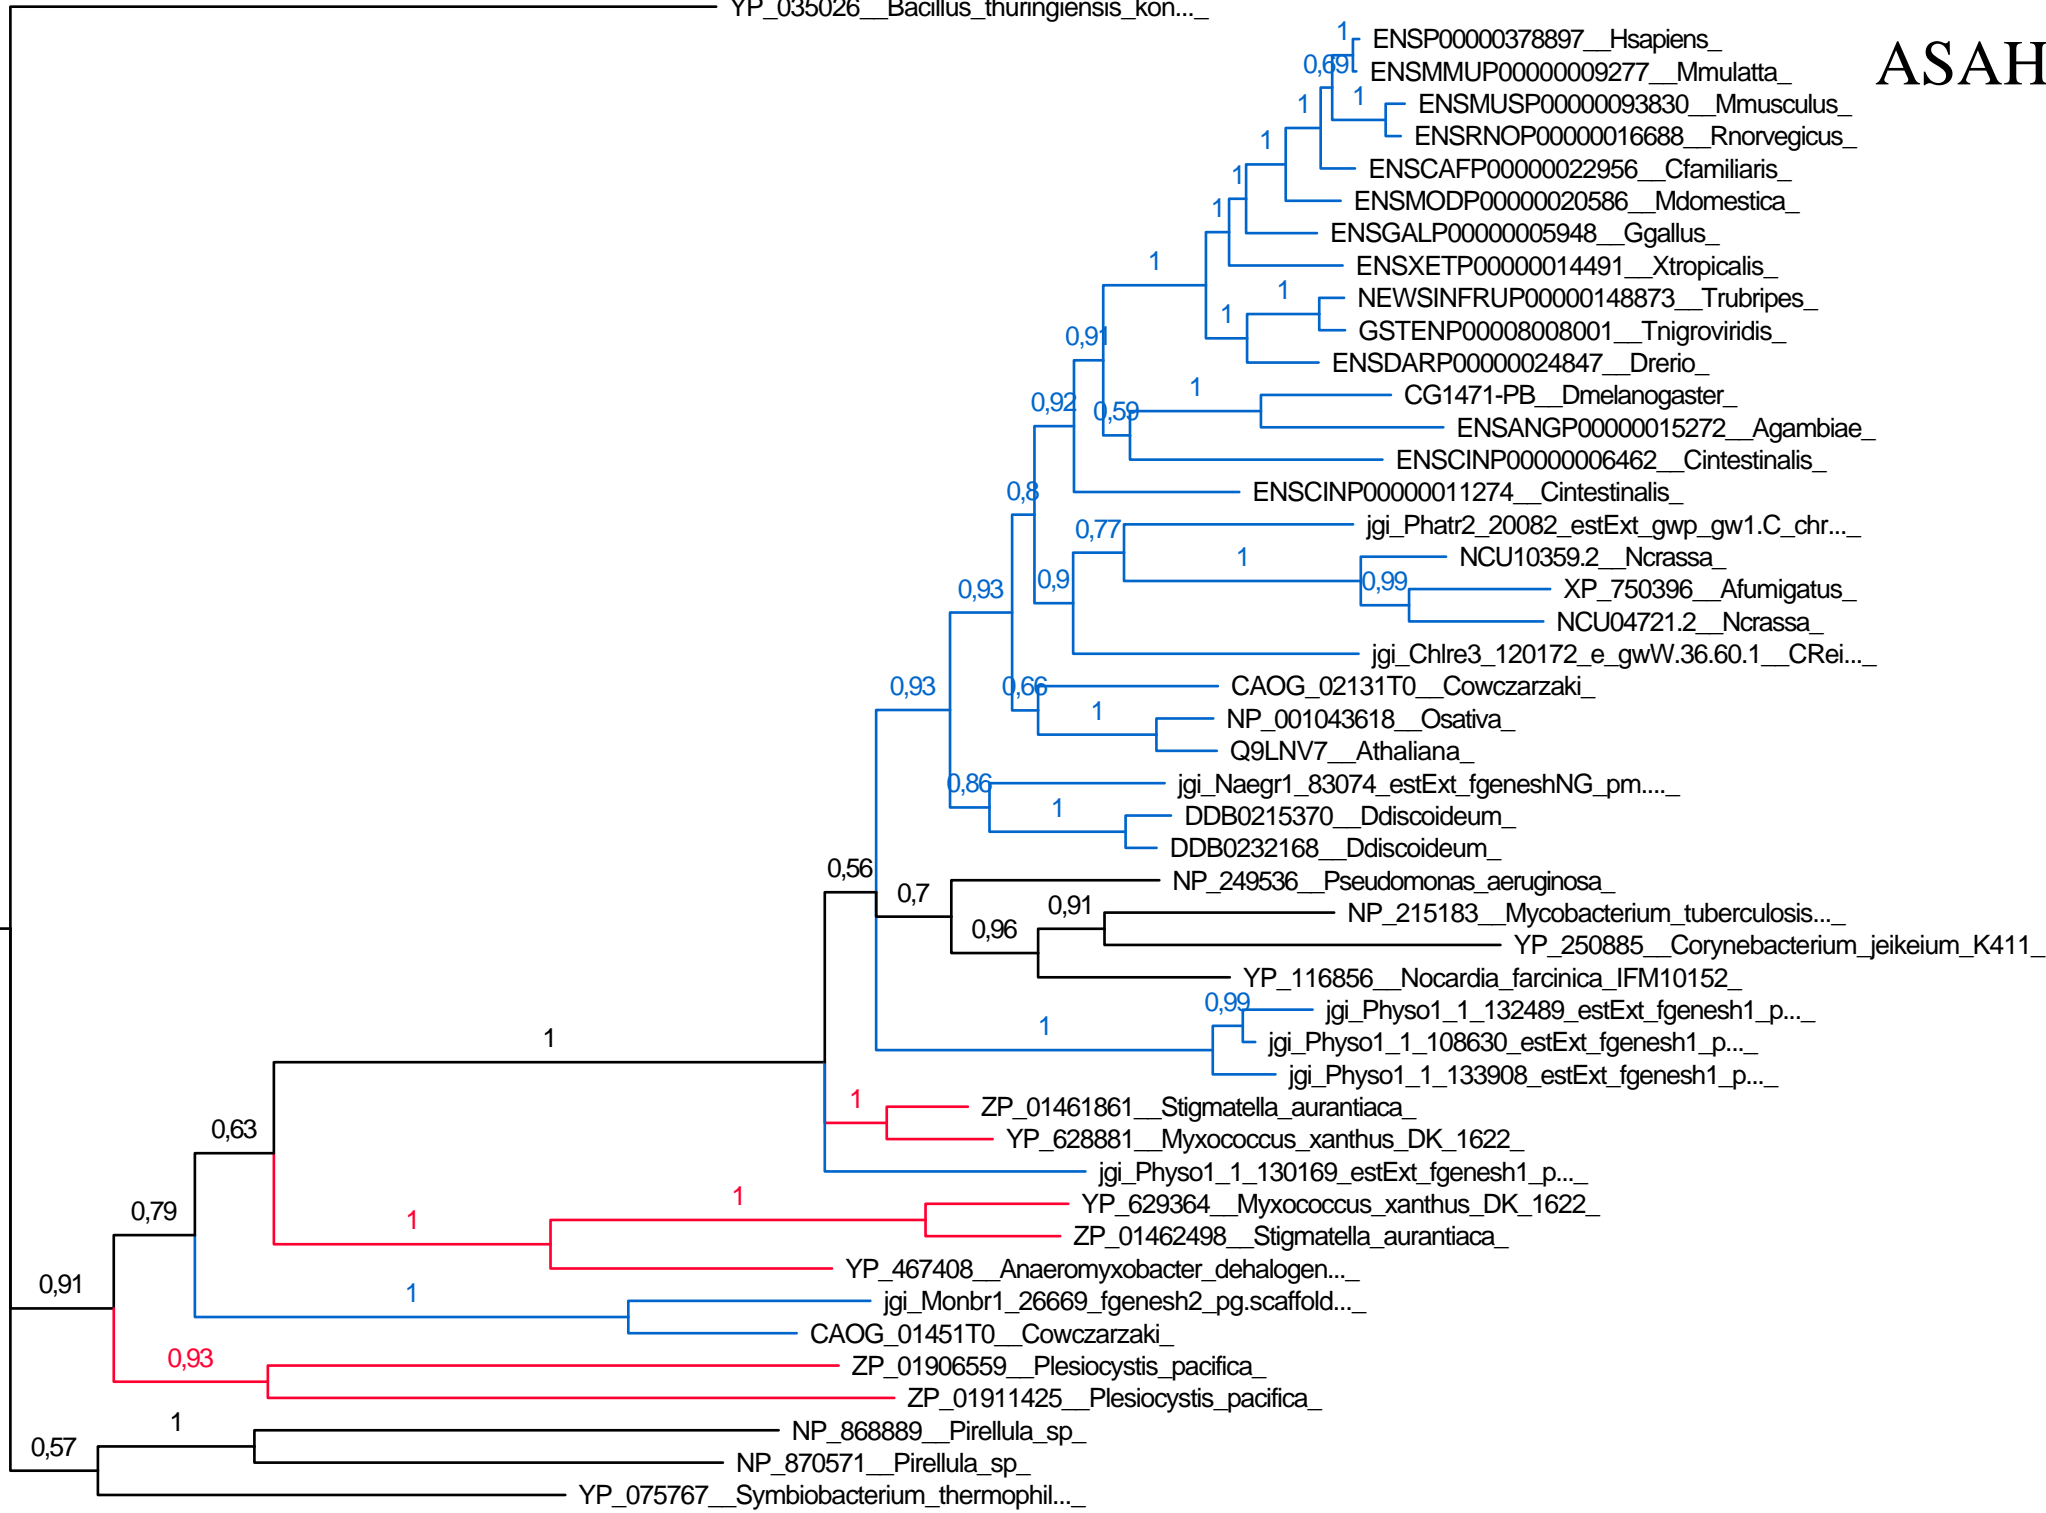

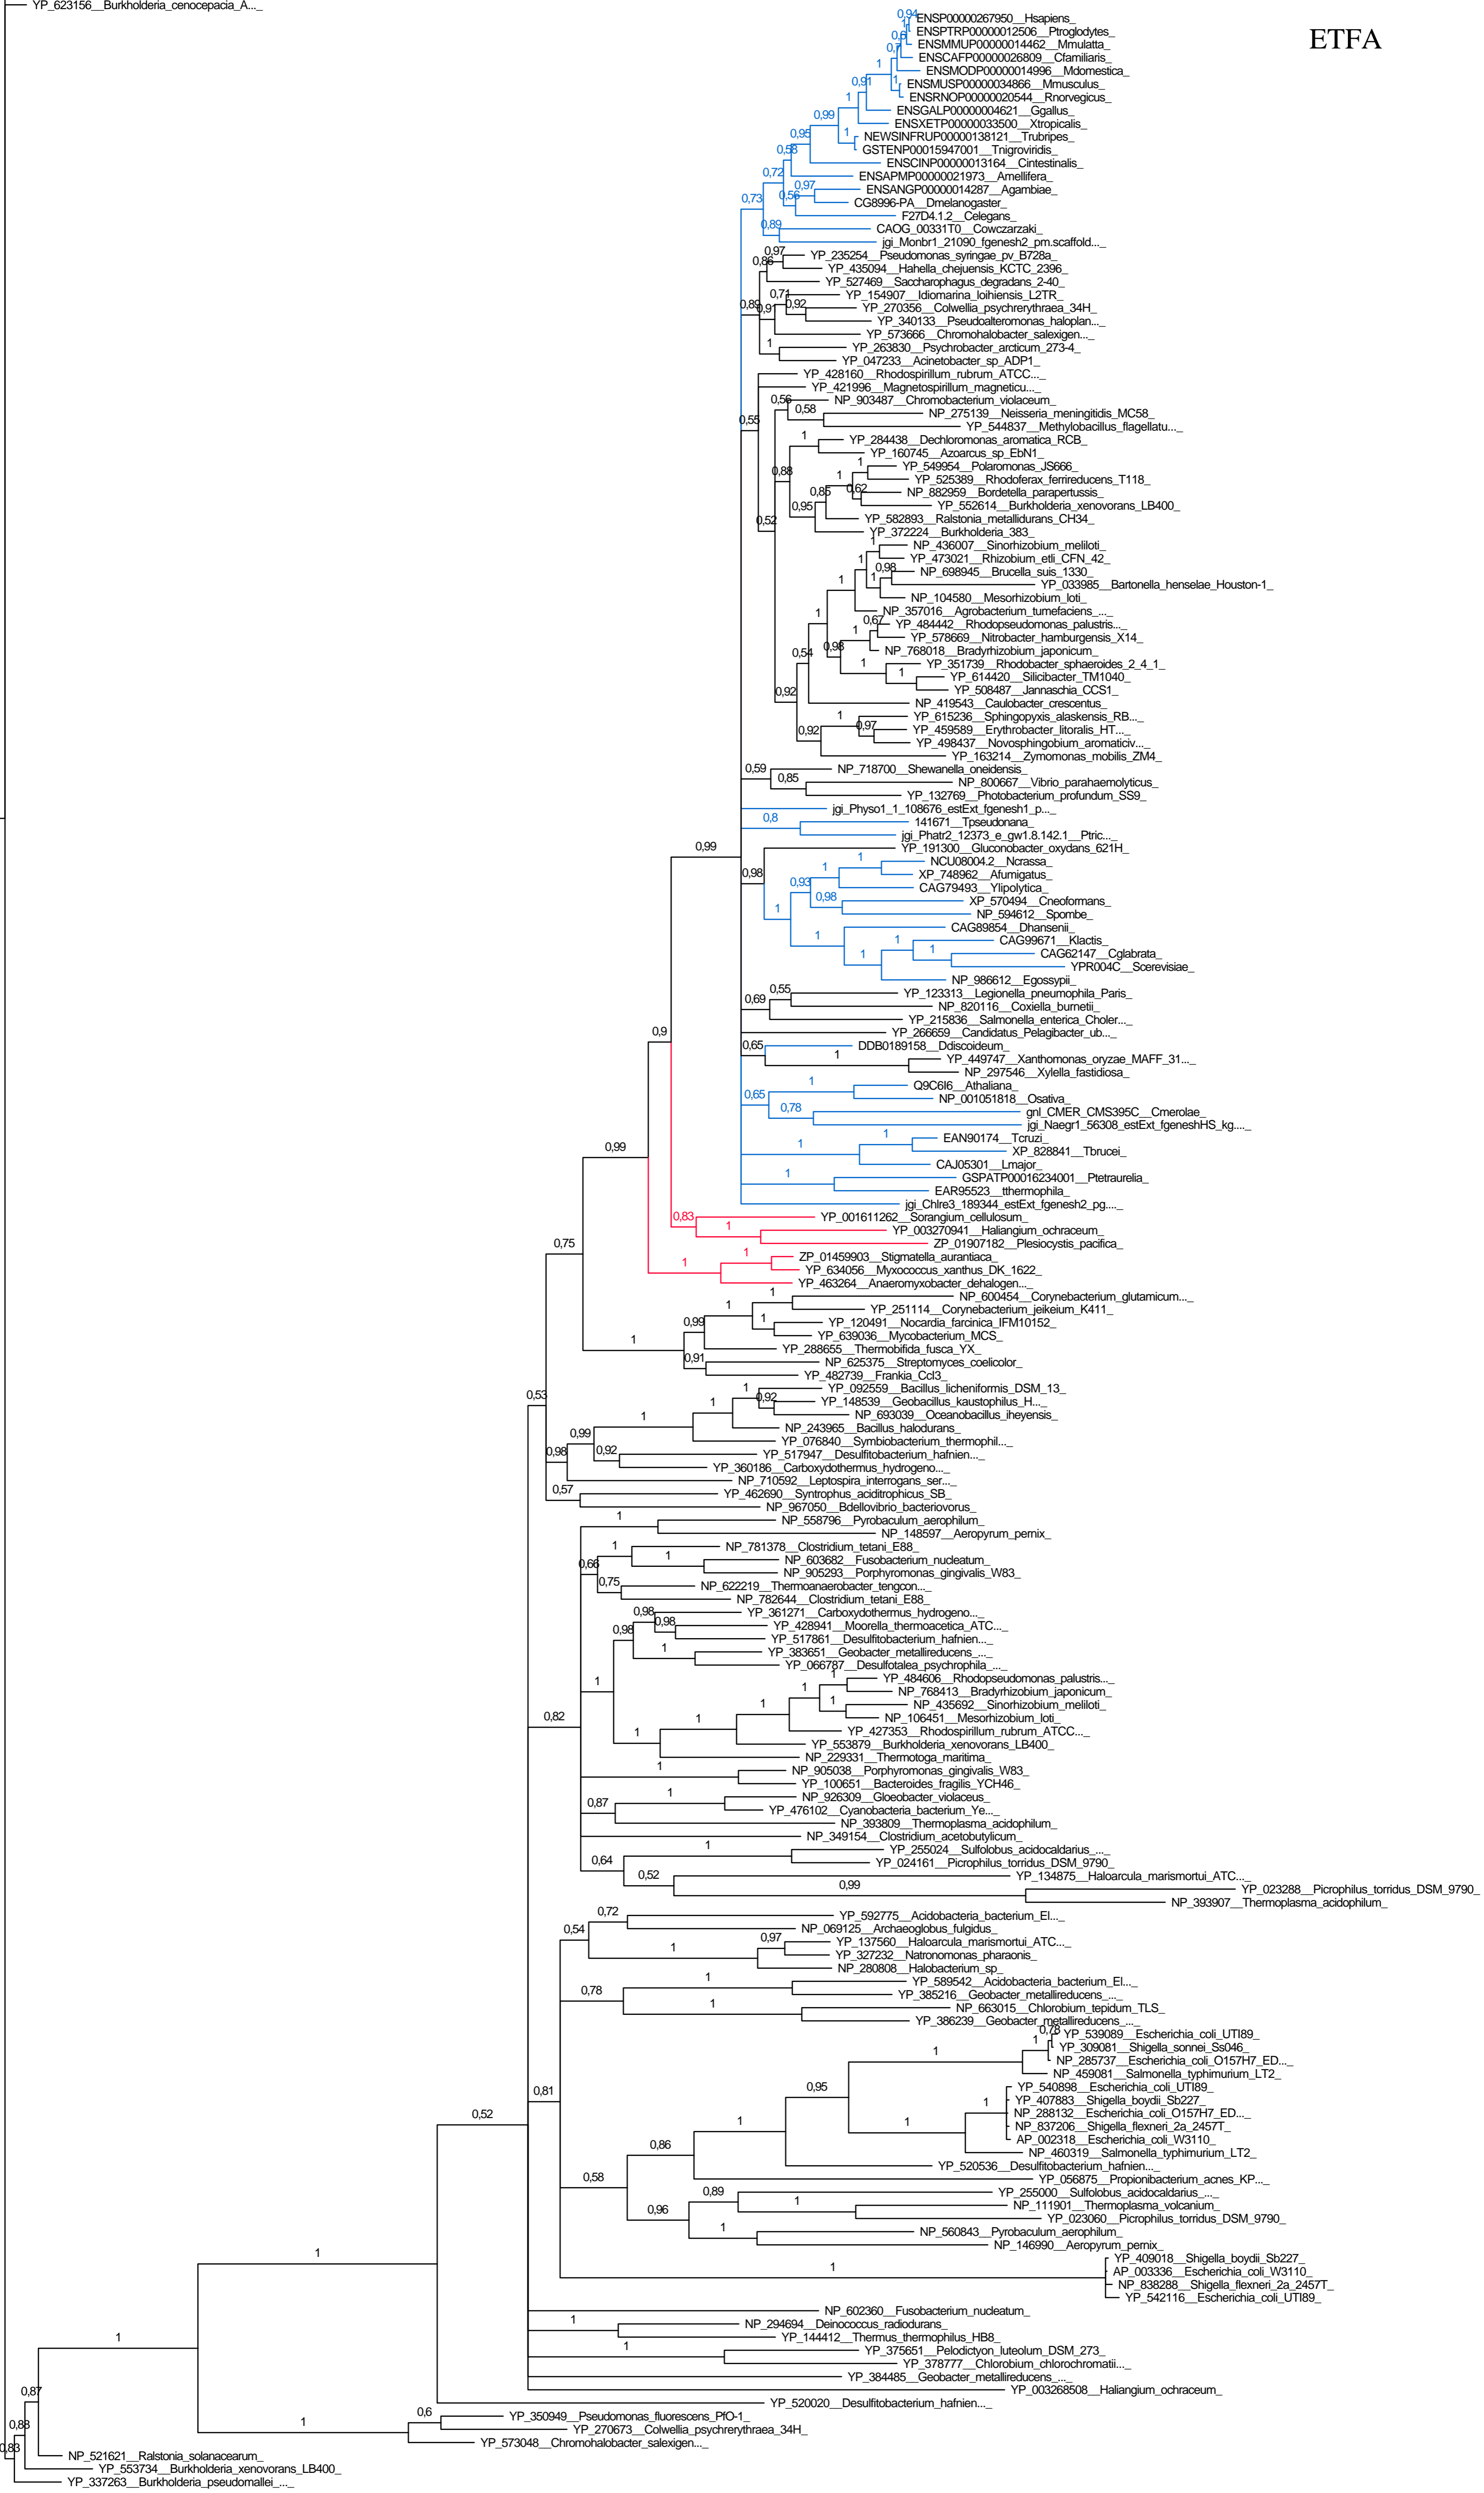



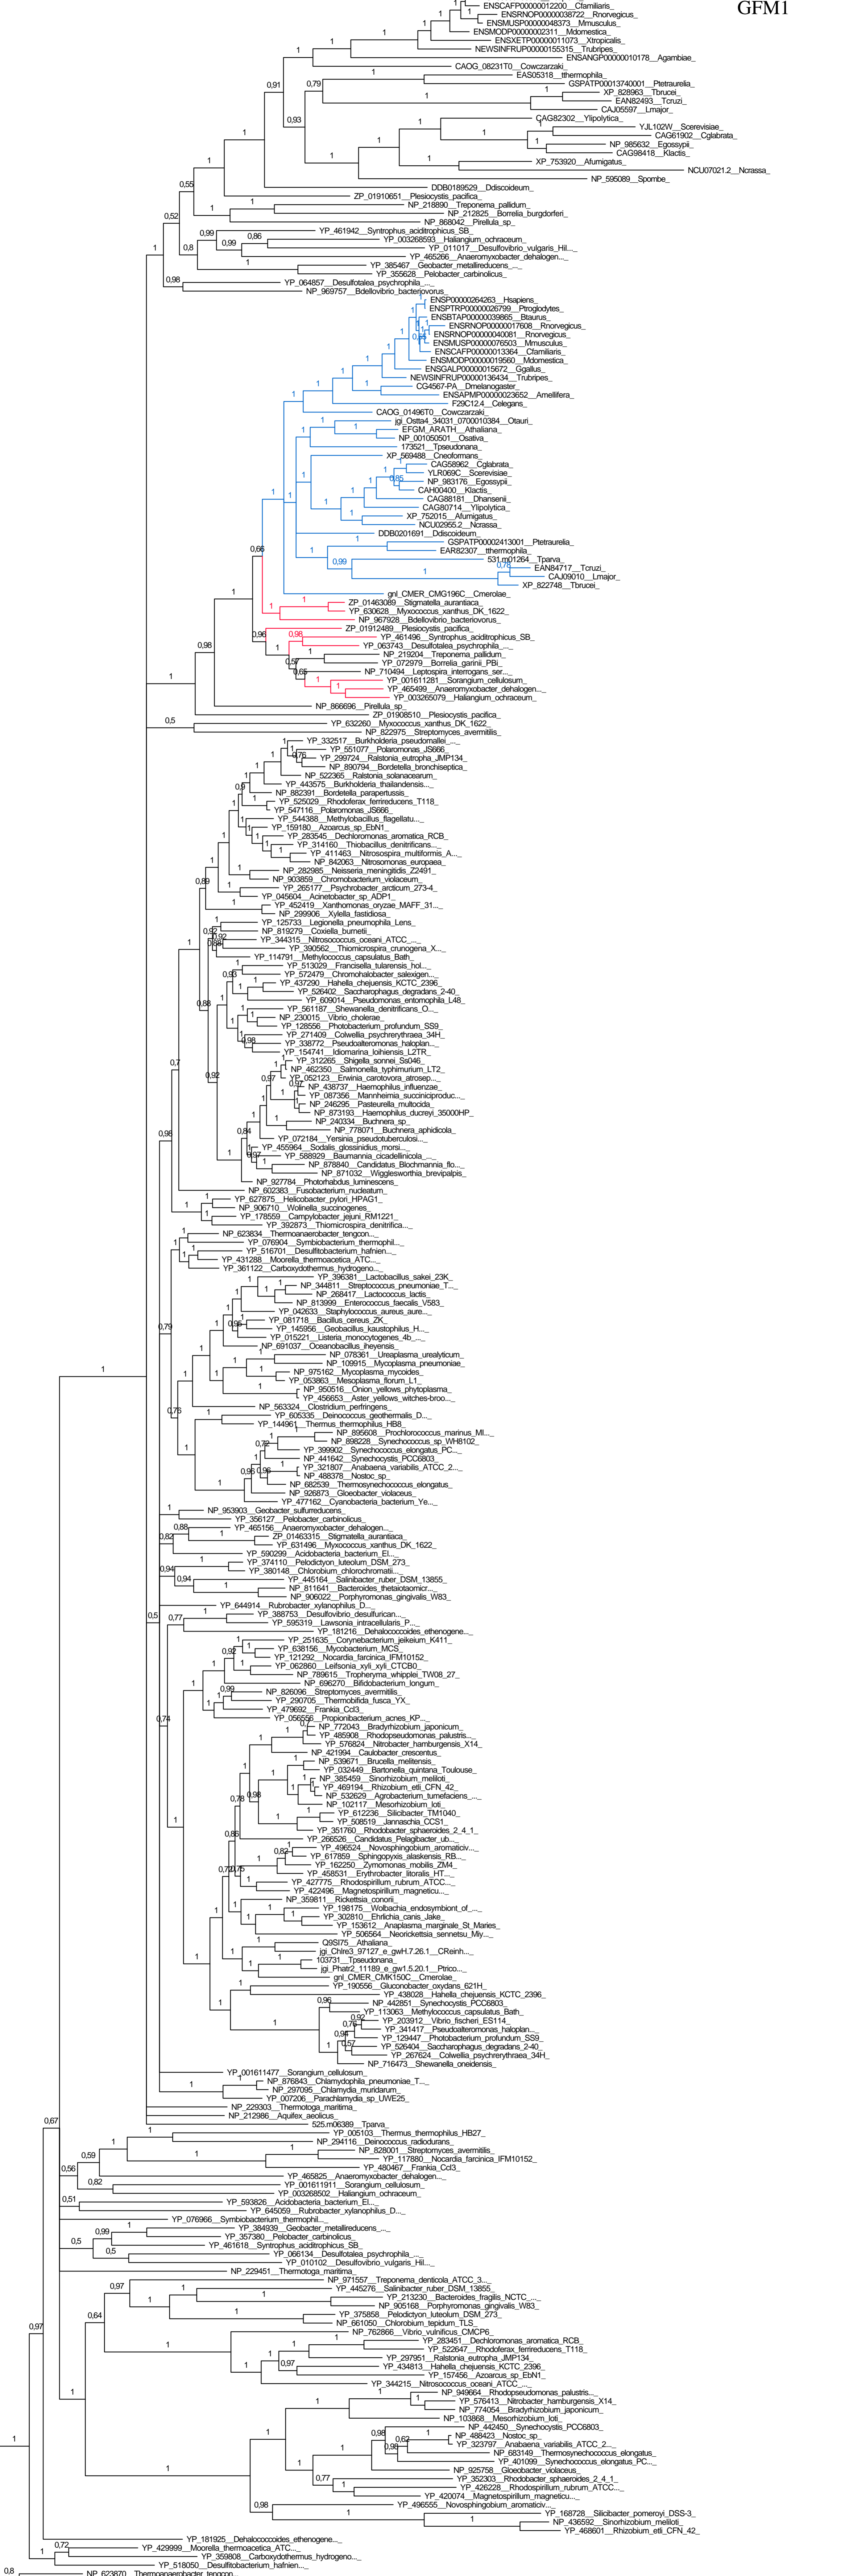



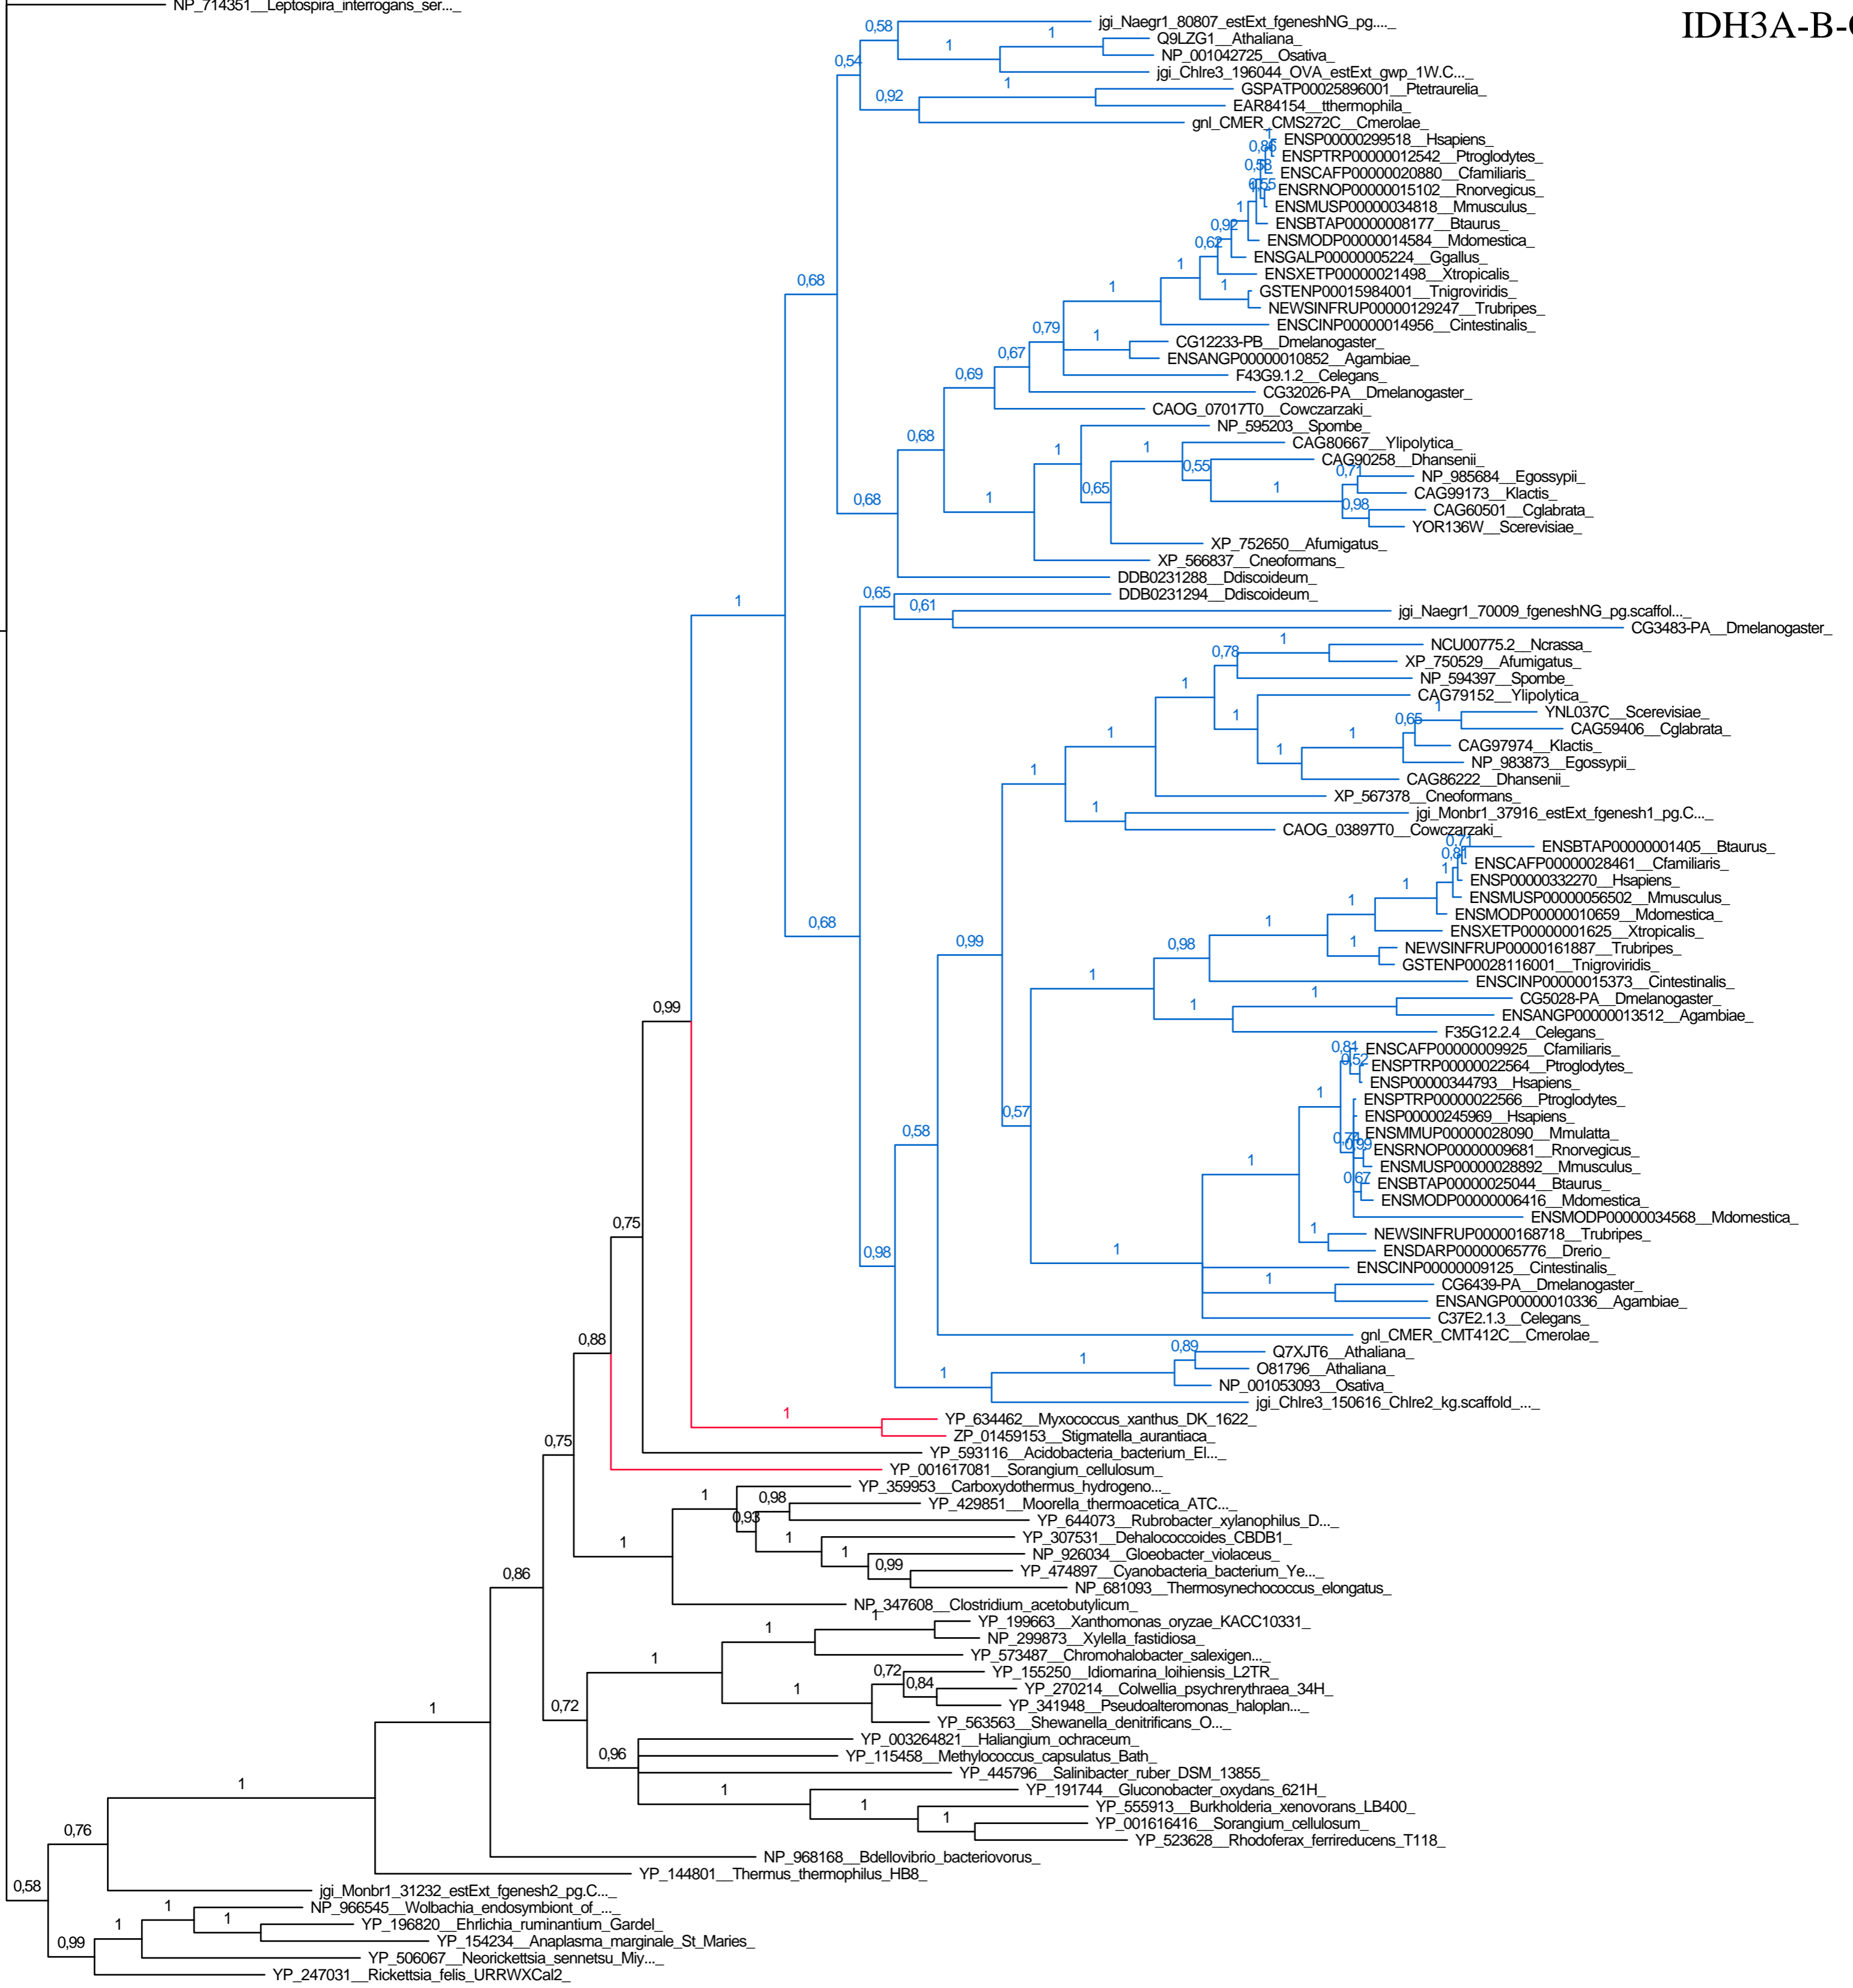



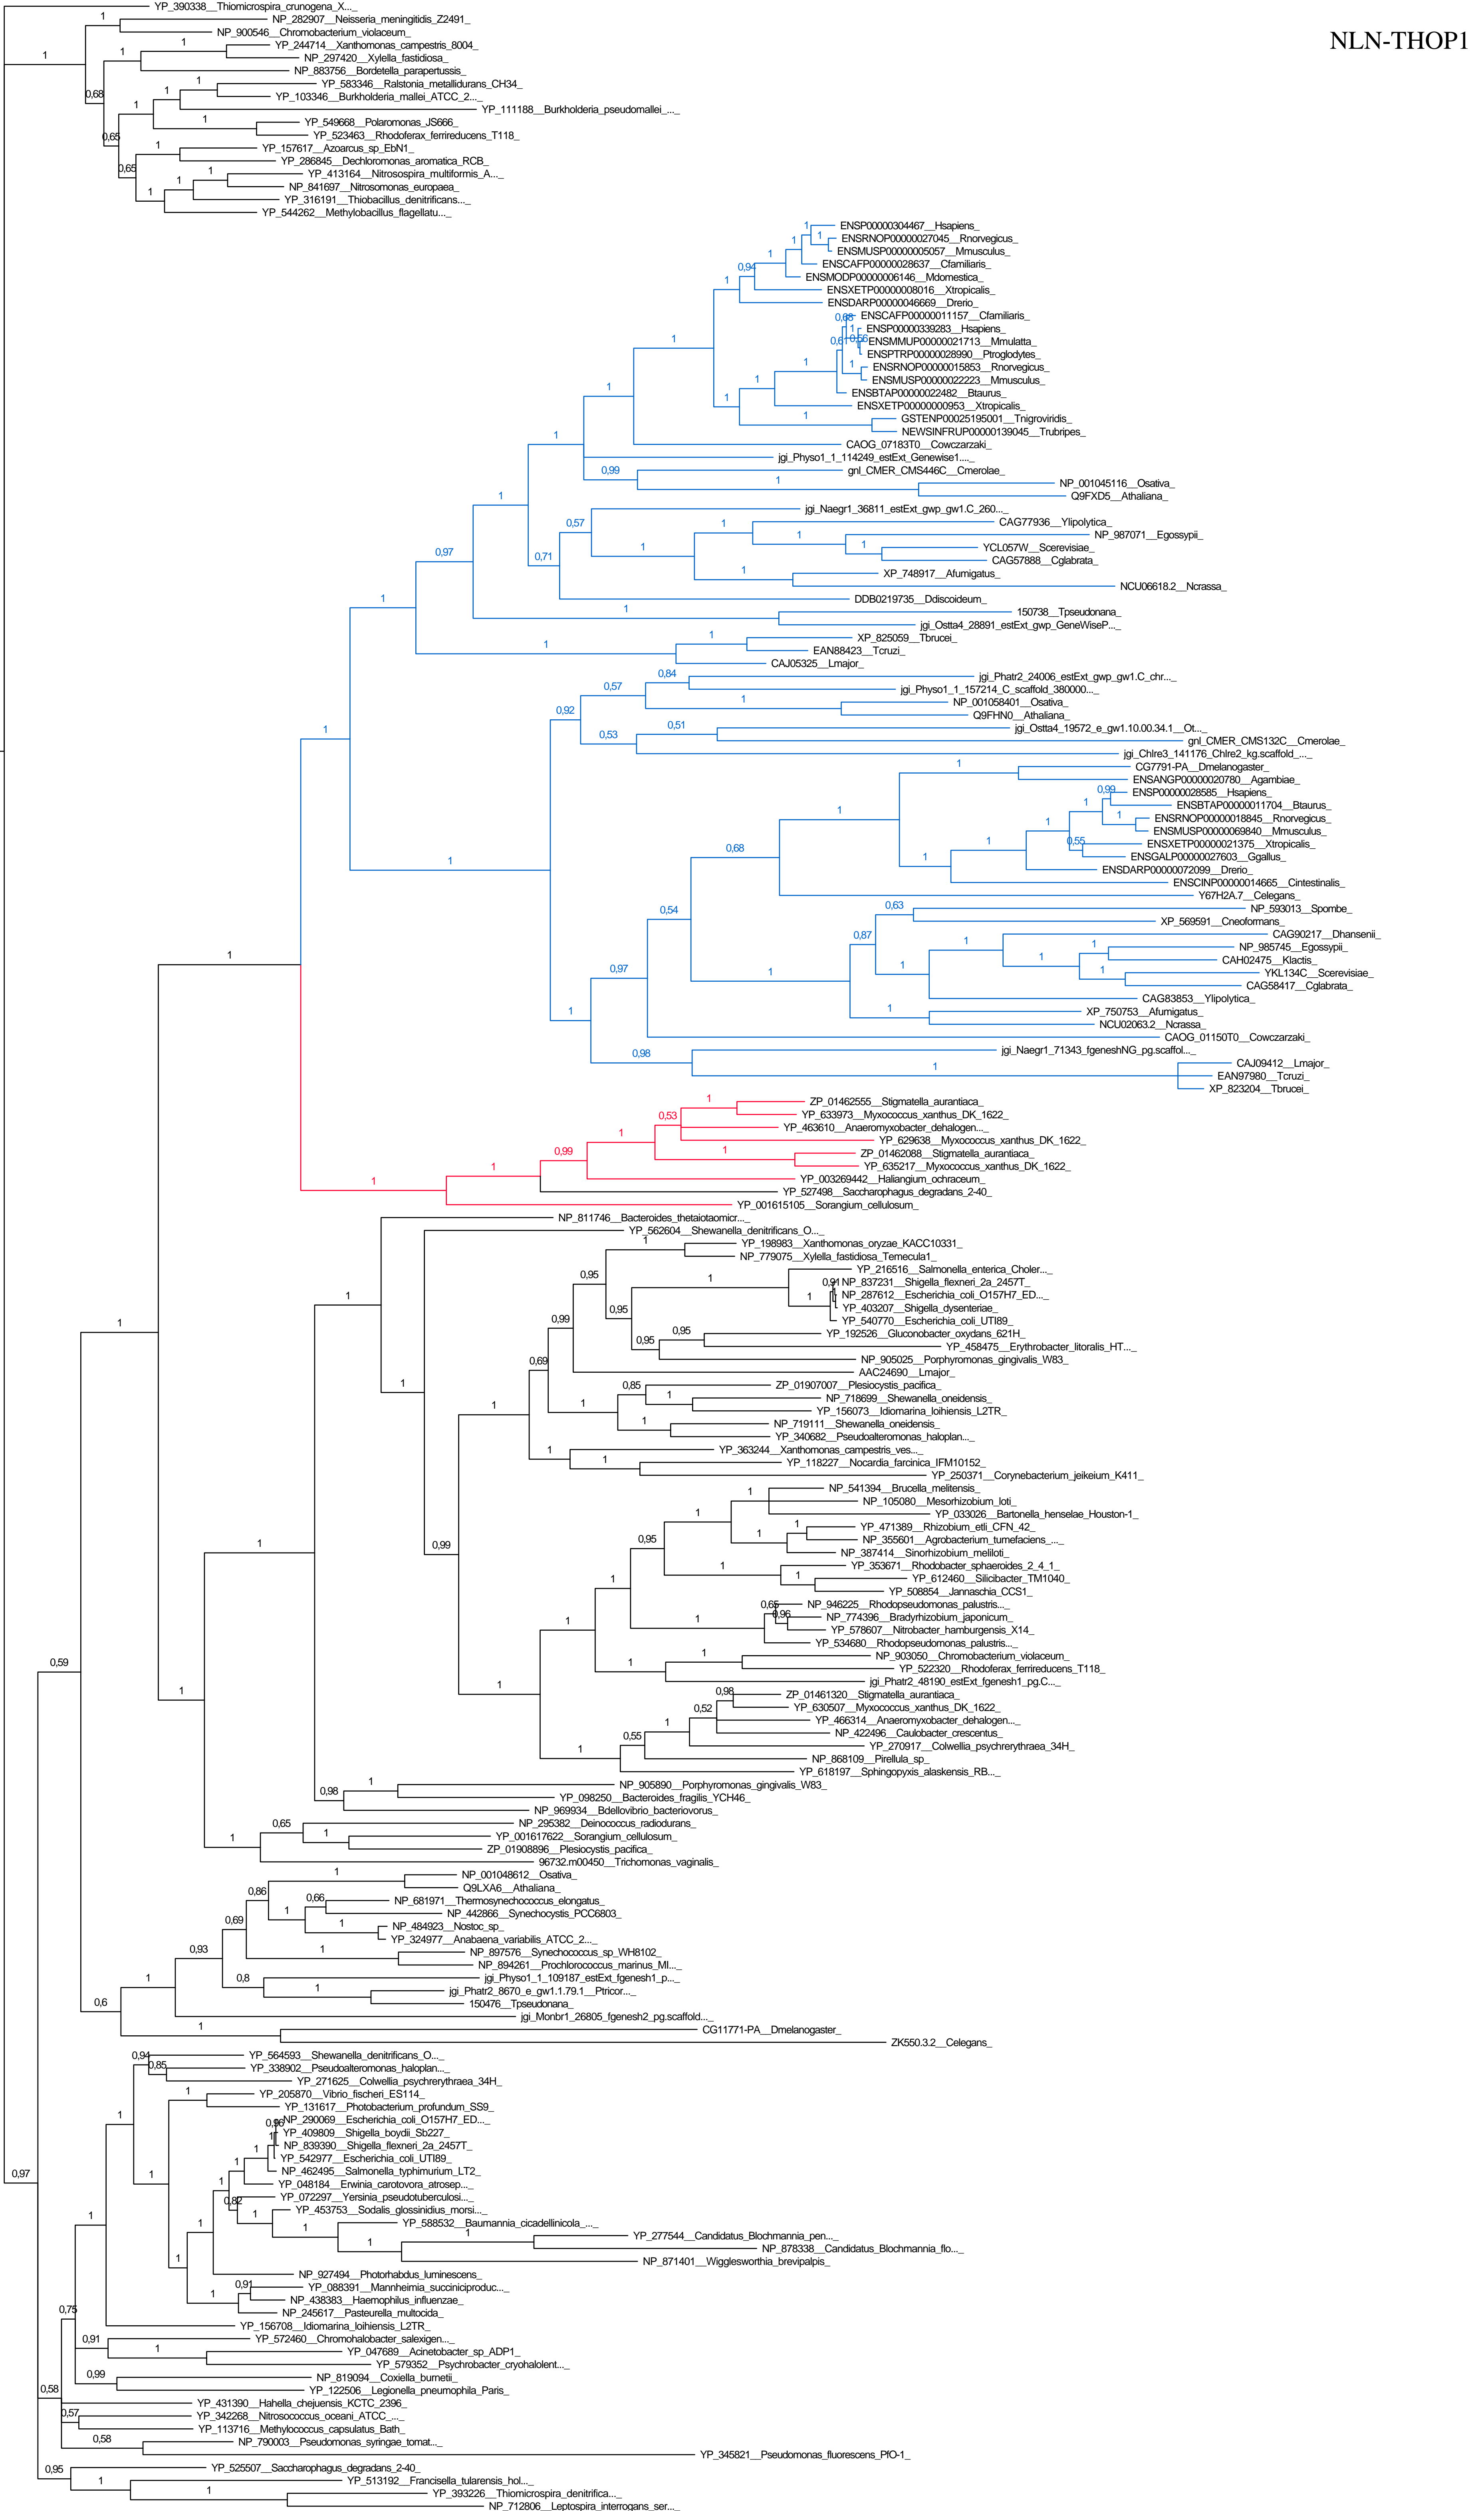



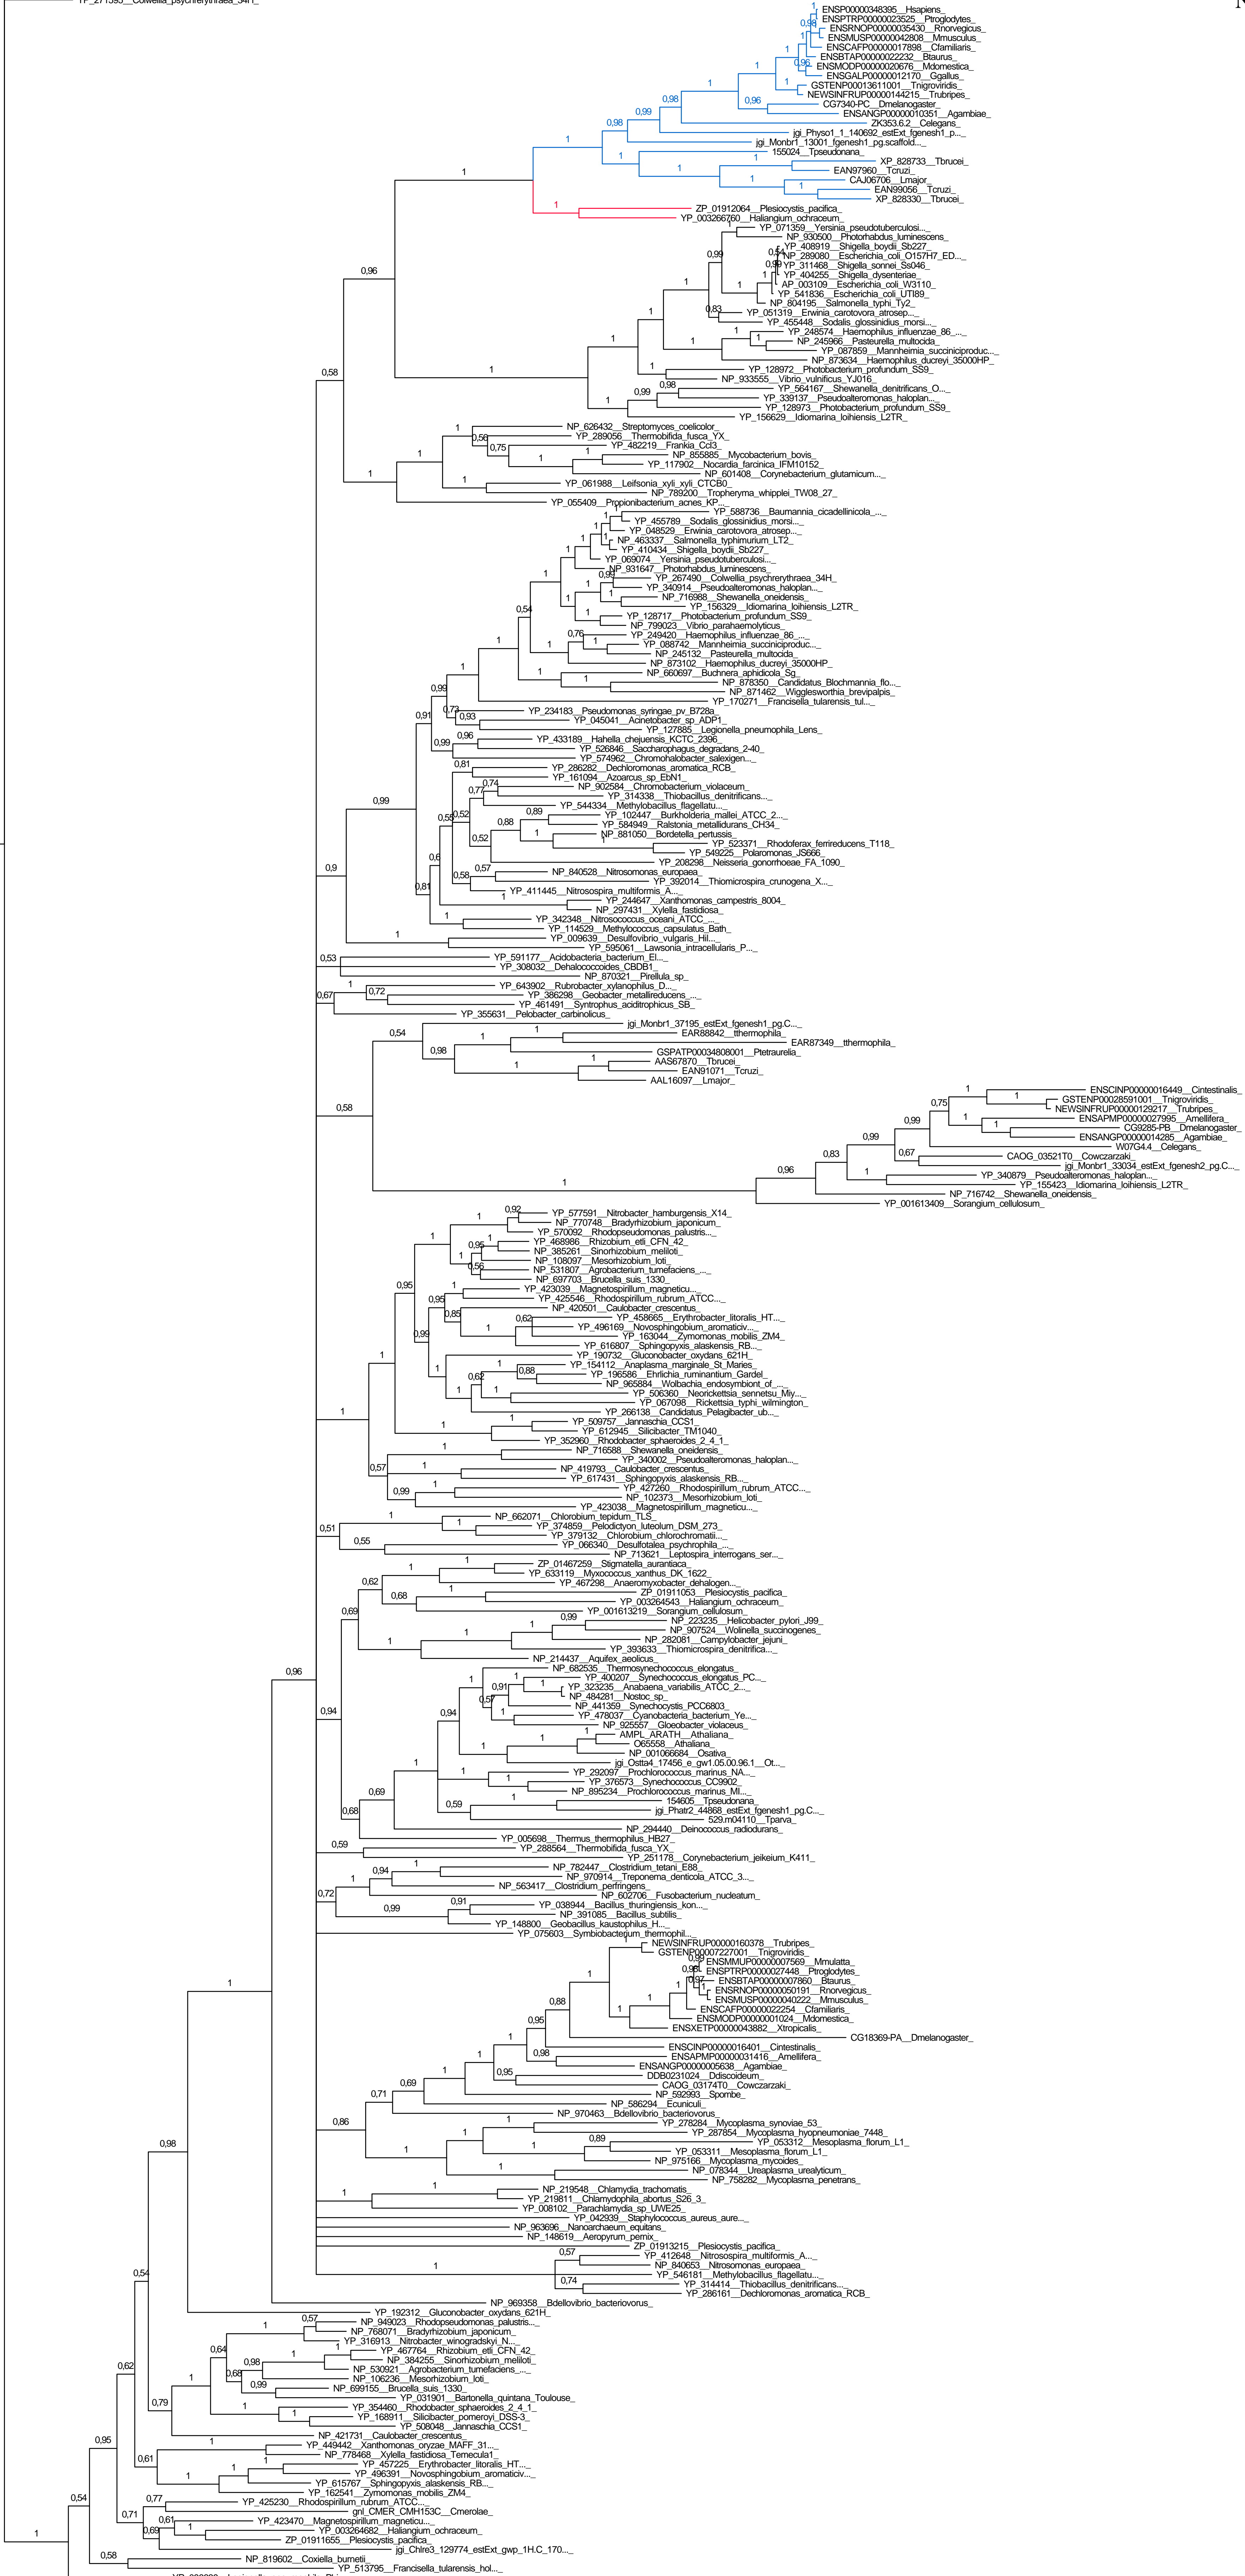



YP\_294353\_Ralstonia\_eutropha\_JMP134  
YP\_622179\_Burkholderia\_cenocepacia\_A...

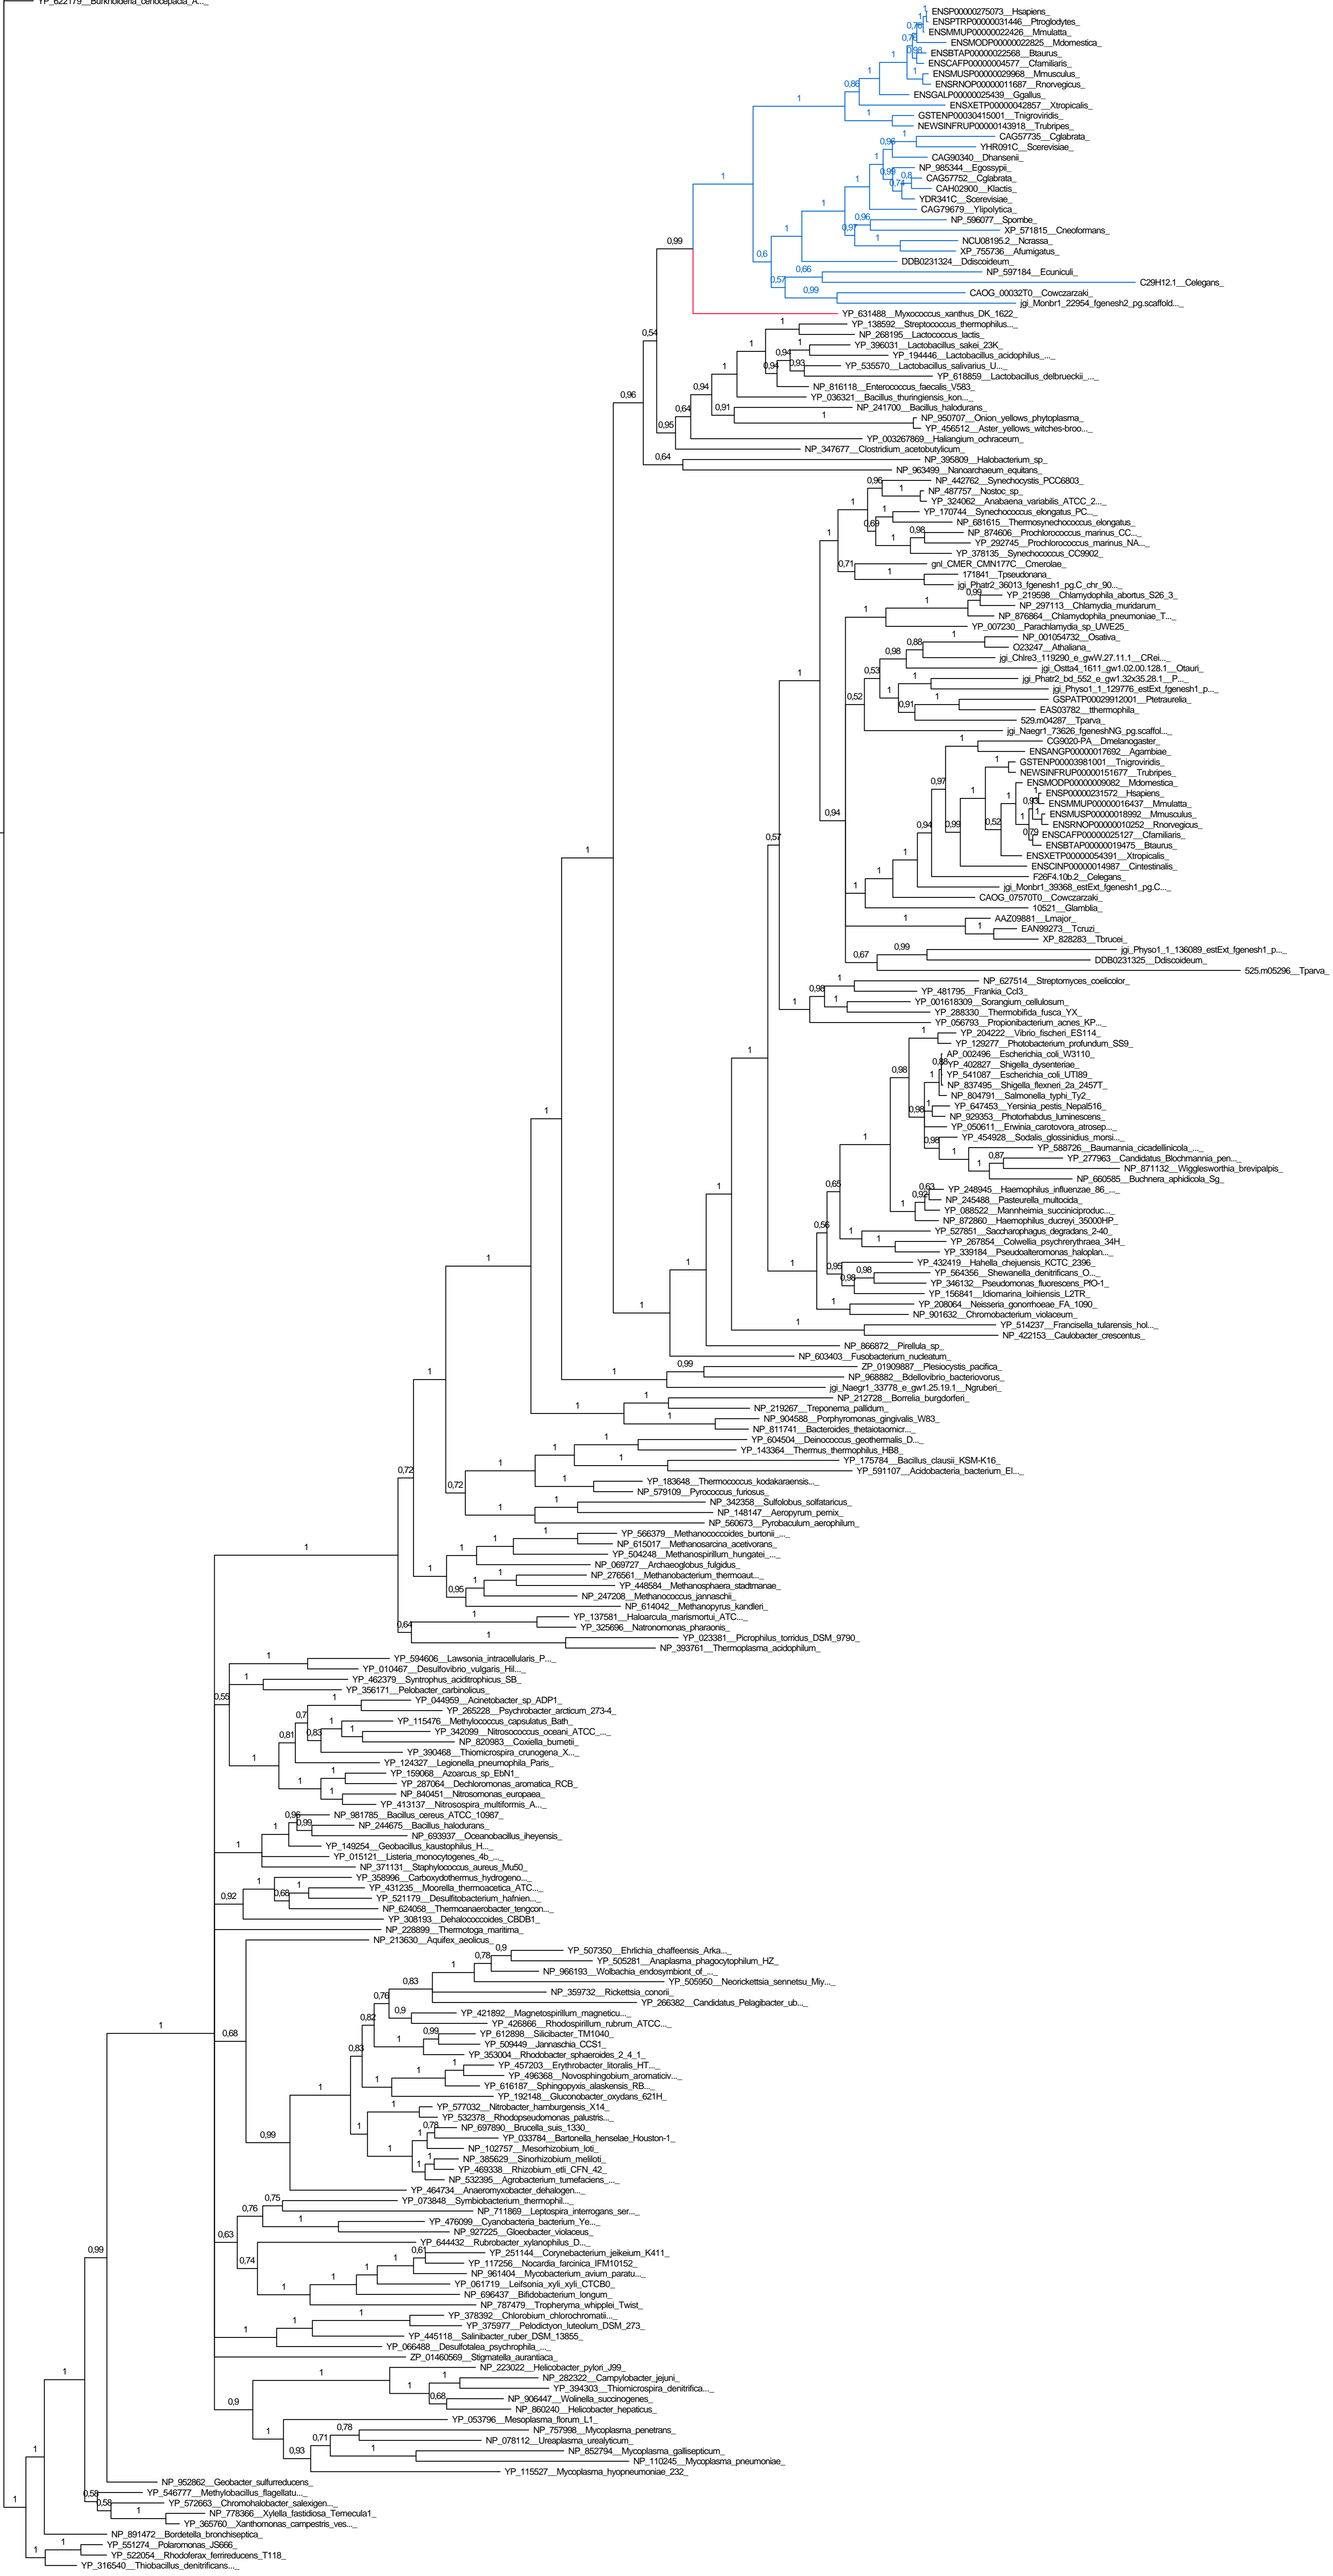

Supplement: pone.0021989.s005.pdf [file pone.0021989.s005.pdf]
