# Supplementary material for: Phylogenomic Evidence for a Myxococcal Contribution to the Mitochondrial Fatty Acid Beta-Oxidation
Source: PubMed Central journal article supplement (PMC3131387; doi:10.1371/journal.pone.0021989), 2011-07-07

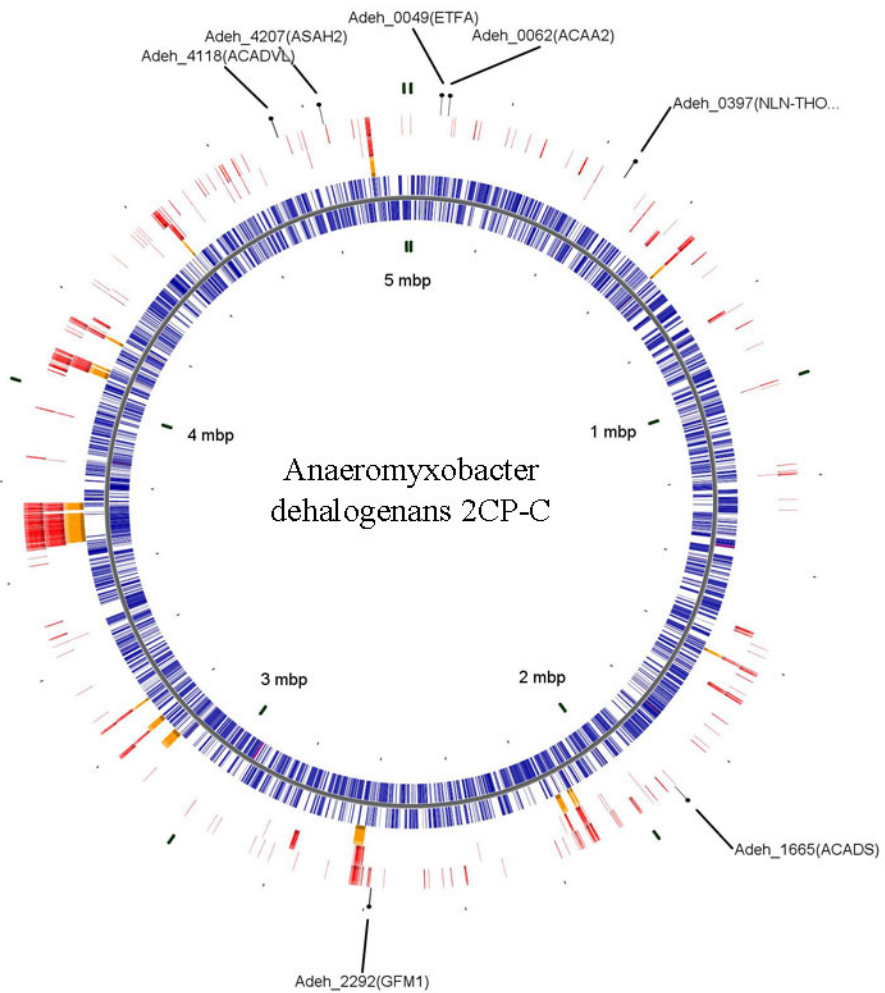

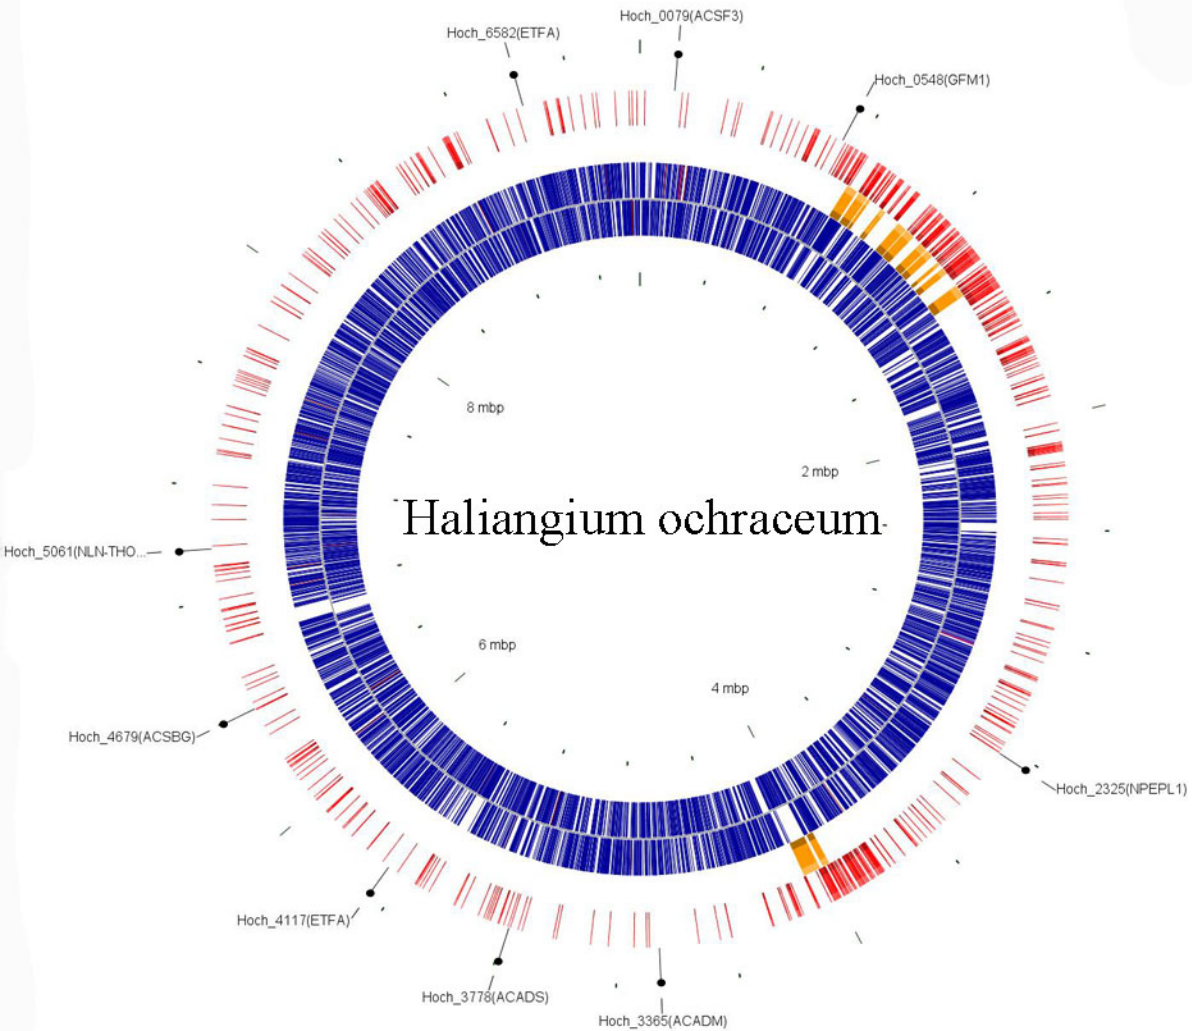

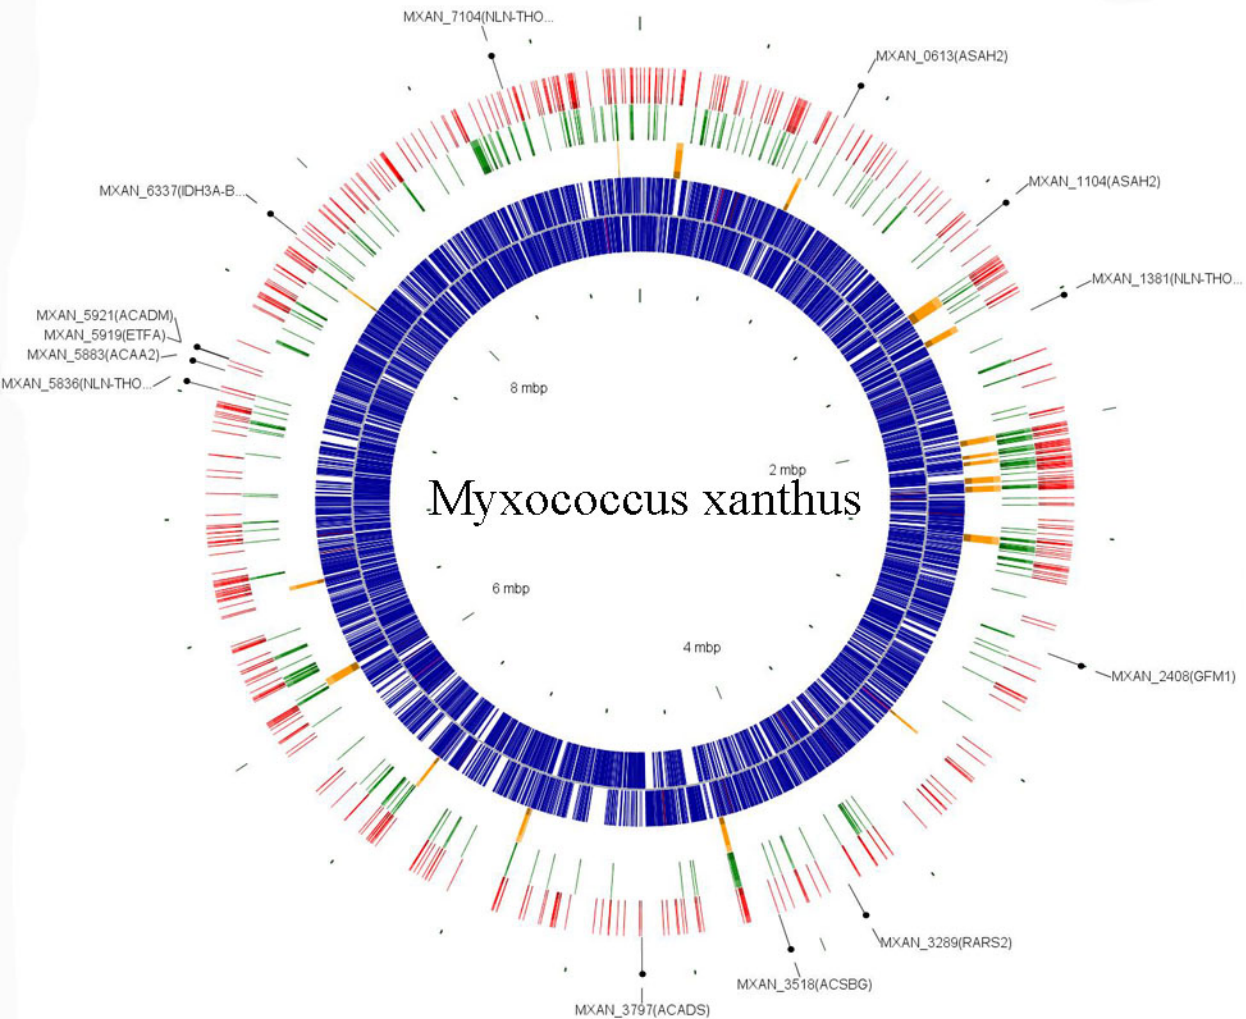

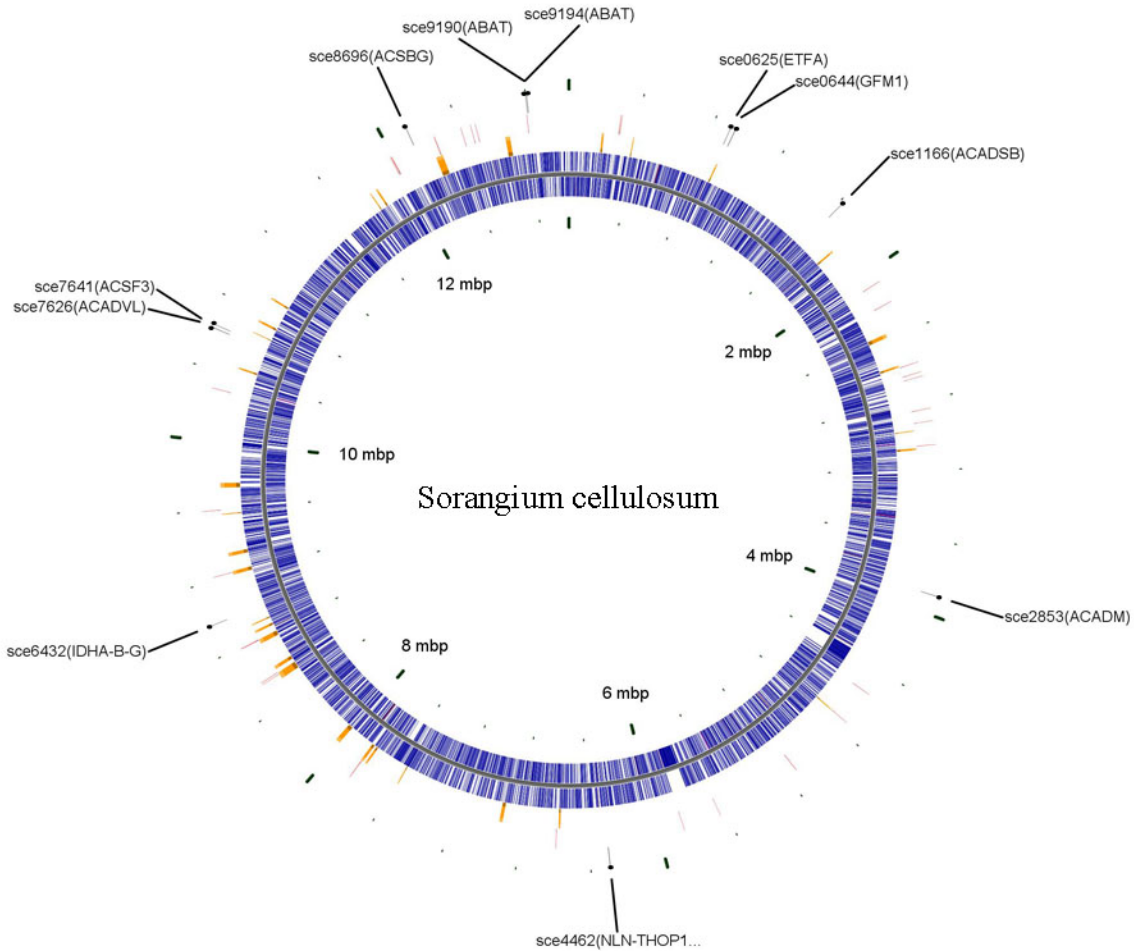

Supplement: pone.0021989.s002.pdf [file pone.0021989.s002.pdf]
